# Supplementary material for: Rotaxanes of a macrocyclic ferrocenophane with dialkylammonium axle components
Source: Royal Society of Chemistry journal article supplement (doi:10.1039/b907417a), 2009-01-01
Supplement: b907417a.pdf [file b907417a.pdf]

*Electronic Supplementary Information (ESI) of*

# Rotaxanes of a Macrocyclic Ferrocenophane with Dialkylammonium Axle Components

*Yuji Suzuki, Eriko Chihara, Atsuko Takagi and Kohtaro Osakada\**

Chemical Resources Laboratory, Tokyo Institute of Technology

4259 Nagatsuta, Midori-ku, Yokohama 226-8503 (Japan)

E-mail: kosakada@res.titech.ac.jp

## Experimental Section

### **(C<sub>6</sub>H<sub>4</sub>-4-tBu)<sub>3</sub>CC<sub>6</sub>H<sub>4</sub>-4-OC<sub>6</sub>H<sub>4</sub>-4-CHO**

An *N*-methyl-2-pyrrolidone (NMP) solution (24 cm<sup>3</sup>) containing (C<sub>6</sub>H<sub>4</sub>-4-tBu)<sub>3</sub>CC<sub>6</sub>H<sub>4</sub>-4-OH (3.0 g, 6.0 mmol), 4-fluorobenzaldehyde (1.3 g, 12 mmol), CsF (2.2 g, 13 mmol) was stirred for 24 h at 100 °C. The crude product was collected by filtration, which was washed with hexane and Et<sub>2</sub>O to give (C<sub>6</sub>H<sub>4</sub>-4-tBu)<sub>3</sub>CC<sub>6</sub>H<sub>4</sub>-4-OC<sub>6</sub>H<sub>4</sub>-4-CHO as white solid in quantitative yield; δ<sub>H</sub>(250 MHz; CDCl<sub>3</sub>; r.t.) 1.31 (27 H, s, CH<sub>3</sub>), 6.95 (2 H, d, *J* 9, C<sub>6</sub>H<sub>4</sub>O), 7.08-7.11 (8 H, <sup>t</sup>BuC<sub>6</sub>H<sub>4</sub>, C<sub>6</sub>H<sub>4</sub>O), 7.21-7.27 (8 H, <sup>t</sup>BuC<sub>6</sub>H<sub>4</sub>, C<sub>6</sub>H<sub>4</sub>O), 7.85 (2 H, d, *J* 8, C<sub>6</sub>H<sub>4</sub>O) and 9.92 (1 H, s, CHO); δ<sub>C</sub>(100 MHz; CDCl<sub>3</sub>; r.t.) 31.4 (CH<sub>3</sub>), 34.4 (C(CH<sub>3</sub>)), 63.4 (C(<sup>t</sup>BuC<sub>6</sub>H<sub>4</sub>)<sub>3</sub>), 117.6 (C<sub>6</sub>H<sub>4</sub>), 118.7 (C<sub>6</sub>H<sub>4</sub>), 124.1 (<sup>t</sup>BuC<sub>6</sub>H<sub>4</sub>), 130.6 (<sup>t</sup>BuC<sub>6</sub>H<sub>4</sub>), 131.2 (C<sub>6</sub>H<sub>4</sub>), 131.8 (C<sub>6</sub>H<sub>4</sub>), 132.9

(C<sub>6</sub>H<sub>4</sub>), 143.6 (C<sub>6</sub>H<sub>4</sub>), 144.0 (C<sub>6</sub>H<sub>4</sub>), 148.5 (C<sub>6</sub>H<sub>4</sub>), 152.8 (C<sub>6</sub>H<sub>4</sub>), 163.1 (C<sub>6</sub>H<sub>4</sub>) and 190.6 (CHO); *m/z* (HRFABMS) 609.3737 ([M + H]<sup>+</sup>. C<sub>44</sub>H<sub>49</sub>O<sub>2</sub> requires 609.3733).

**(C<sub>6</sub>H<sub>4</sub>-4-tBu)<sub>3</sub>CC<sub>6</sub>H<sub>4</sub>-4-OC<sub>6</sub>H<sub>4</sub>-4-C=NCH<sub>2</sub>C<sub>6</sub>H<sub>4</sub>-4-OCH<sub>2</sub>CH<sub>2</sub>CH=CH<sub>2</sub>**

A solution of (C<sub>6</sub>H<sub>4</sub>-4-tBu)<sub>3</sub>CC<sub>6</sub>H<sub>4</sub>-4-OC<sub>6</sub>H<sub>4</sub>-4-CHO (1.8 g, 3.0 mmol) and H<sub>2</sub>NCH<sub>2</sub>C<sub>6</sub>H<sub>4</sub>OCH<sub>2</sub>CH<sub>2</sub>CH=CH<sub>2</sub> (0.53 g, 3.0 mmol) in toluene (50 cm<sup>3</sup>) was stirred under reflux condition in the presence of MS4A (Molecular sieves 4 Å, 1.2 g). After removal of MS4A, evaporation of the solution to dryness produced (C<sub>6</sub>H<sub>4</sub>-4-tBu)<sub>3</sub>CC<sub>6</sub>H<sub>4</sub>-4-OC<sub>6</sub>H<sub>4</sub>-4-C=NCH<sub>2</sub>C<sub>6</sub>H<sub>4</sub>-4-OCH<sub>2</sub>CH<sub>2</sub>CH=CH<sub>2</sub> as a white solid which was washed with hexane (1.7 g, 2.2 mmol, 74%) (Found: C, 85.42; H, 7.83; N, 1.87. C<sub>55</sub>H<sub>61</sub>NO<sub>2</sub>(H<sub>2</sub>O)<sub>0.25</sub> requires C, 85.50; H, 8.02; N, 1.81%); δ<sub>H</sub>(300 MHz; CDCl<sub>3</sub>; r.t.) 1.33 (27 H, s, CH<sub>3</sub>), 2.56 (2 H, dt, *J* 7 and 7, CH<sub>2</sub>CH=CH<sub>2</sub>), 4.03 (2 H, t, *J* 7, OCH<sub>2</sub>), 4.76 (2 H, s, NCH<sub>2</sub>), 5.13 (1 H, d, *J* 10, cis-CH=CH<sub>2</sub>), 5.19 (1 H, d, *J* 17, trans-CH=CH<sub>2</sub>), 5.93 (1 H, ddt, *J* 17, 10 and 7, CH=CH<sub>2</sub>), 6.89-6.93 (4 H, C<sub>6</sub>H<sub>4</sub>), 7.06 (2 H, d, *J* 8, C<sub>6</sub>H<sub>4</sub>), 7.12 (6 H, d, *J* 9, <sup>t</sup>BuC<sub>6</sub>H<sub>4</sub>), 7.19 (6 H, d, *J* 9, C<sub>6</sub>H<sub>4</sub>), 7.24-7.29 (8 H, <sup>t</sup>BuC<sub>6</sub>H<sub>4</sub>, C<sub>6</sub>H<sub>4</sub>), 7.76 (2 H, d, *J* 8, C<sub>6</sub>H<sub>4</sub>) and 8.34 (1 H, s, CH=N); δ<sub>C</sub>(75.5 MHz; CDCl<sub>3</sub>; r.t.) 31.3 (CH<sub>3</sub>), 33.6 (CH<sub>2</sub>CH=CH<sub>2</sub>), 34.3 (C(CH<sub>3</sub>)), 63.2 (C(<sup>t</sup>BuC<sub>6</sub>H<sub>4</sub>)<sub>3</sub>), 64.4 (NCH<sub>2</sub>), 67.2 (OCH<sub>2</sub>), 114.6, 117.0, 117.8, 118.4, 124.1 (<sup>t</sup>BuC<sub>6</sub>H<sub>4</sub>), 129.1, 129.8, 130.7 (<sup>t</sup>BuC<sub>6</sub>H<sub>4</sub>), 131.1, 131.4, 132.7, 134.5, 142.9, 143.8, 148.5, 154.1, 157.9, 159.6 and 160.8.

**(C<sub>6</sub>H<sub>4</sub>-4-tBu)<sub>3</sub>CC<sub>6</sub>H<sub>4</sub>-4-OC<sub>6</sub>H<sub>4</sub>-4-CH<sub>2</sub>NHCH<sub>2</sub>C<sub>6</sub>H<sub>4</sub>-4-OCH<sub>2</sub>CH<sub>2</sub>CH=CH<sub>2</sub>**

(C<sub>6</sub>H<sub>4</sub>-4-tBu)<sub>3</sub>CC<sub>6</sub>H<sub>4</sub>-4-OC<sub>6</sub>H<sub>4</sub>-4-C=NCH<sub>2</sub>C<sub>6</sub>H<sub>4</sub>-4-OCH<sub>2</sub>CH<sub>2</sub>CH=CH<sub>2</sub> (1.0 g, 1.3 mmol) was dissolved in THF (18 cm<sup>3</sup>) at room temperature then the solution was cooled to 0 °C. LiAlH<sub>4</sub> (0.25 g, 6.5 mmol) was added to the solution at 0 °C and the mixture was stirred for 19 h under reflux condition then the solution was cooled to room temperature. The reaction mixture was quenched with 3 M aqueous solution of KOH (20 cm<sup>3</sup>) and the product was extracted by CH<sub>2</sub>Cl<sub>2</sub>. The separated organic phase was dried over MgSO<sub>4</sub> and evaporation of the solution gave crude product which was purified by SiO<sub>2</sub> column chromatography (eluent:

hexane/AcOEt/CH<sub>2</sub>Cl<sub>2</sub> 6:1:1) to give (C<sub>6</sub>H<sub>4</sub>-4-tBu)<sub>3</sub>CC<sub>6</sub>H<sub>4</sub>-4-OC<sub>6</sub>H<sub>4</sub>-4-CH<sub>2</sub>NHCH<sub>2</sub>C<sub>6</sub>H<sub>4</sub>-4-OCH<sub>2</sub>CH<sub>2</sub>CH=CH<sub>2</sub> as a white solid (0.60 g, 0.78 mmol, 60%) (Found: C, 85.28; H, 8.26; N, 1.81. C<sub>55</sub>H<sub>63</sub>NO<sub>2</sub>(H<sub>2</sub>O)<sub>0.25</sub> requires C, 85.00; H, 8.14; N, 1.86%); δ<sub>H</sub>(300 MHz; CDCl<sub>3</sub>; r.t.) 1.30 (27 H, s, CH<sub>3</sub>), 2.54 (2H, dtt, *J* 7, 7 and 2, CH<sub>2</sub>CH=CH<sub>2</sub>), 3.74 (2 H, s, NCH<sub>2</sub>), 3.75 (2 H, s, NCH<sub>2</sub>), 4.01 (2 H, t, *J* 7, OCH<sub>2</sub>), 5.11 (1 H, ddt, *J* 10, 2 and 2, 1H, cis-CH=CH<sub>2</sub>), 5.17 (ddt, *J* = 17, 2 and 2, 1H, trans-CH=CH<sub>2</sub>), 5.91 (ddt, *J* = 17, 10, 7, CH=CH<sub>2</sub>), 6.83-6.88 (4 H, C<sub>6</sub>H<sub>4</sub>), 6.99 (2 H, d, *J* 8, C<sub>6</sub>H<sub>4</sub>), 7.09 (6 H, d, *J* 9, <sup>t</sup>BuC<sub>6</sub>H<sub>4</sub>), 7.12 (2 H, d, *J* 9, C<sub>6</sub>H<sub>4</sub>), 7.29 (2 H, d, *J* 8, C<sub>6</sub>H<sub>4</sub>) and 7.73 (2 H, d, *J* 8, C<sub>6</sub>H<sub>4</sub>); δ<sub>C</sub>(75.5 MHz; CDCl<sub>3</sub>; r.t.) 31.4 (CH<sub>3</sub>), 33.6 (CH<sub>2</sub>CH=CH<sub>2</sub>), 34.3 (C(CH<sub>3</sub>)), 52.4 (NCH<sub>2</sub>), 52.5 (NCH<sub>2</sub>), 63.2 (C(<sup>t</sup>BuC<sub>6</sub>H<sub>4</sub>)<sub>3</sub>), 67.2 (OCH<sub>2</sub>), 114.4, 116.9, 117.0, 119.1, 124.1 (<sup>t</sup>BuC<sub>6</sub>H<sub>4</sub>), 129.3, 129.5, 130.7 (<sup>t</sup>BuC<sub>6</sub>H<sub>4</sub>), 132.3, 132.5, 134.5, 135.2, 142.0, 143.9, 148.4, 155.3, 155.9 and 157.9; R<sub>f</sub> 0.21 (hexane/AcOEt/CH<sub>2</sub>Cl<sub>2</sub> 6:1:1).

**[(C<sub>6</sub>H<sub>4</sub>-4-tBu)<sub>3</sub>CC<sub>6</sub>H<sub>4</sub>-4-OC<sub>6</sub>H<sub>4</sub>-4-CH<sub>2</sub>NH<sub>2</sub>CH<sub>2</sub>C<sub>6</sub>H<sub>4</sub>-4-OCH<sub>2</sub>CH<sub>2</sub>CH=CH<sub>2</sub>](Cl)**

(C<sub>6</sub>H<sub>4</sub>-4-tBu)<sub>3</sub>CC<sub>6</sub>H<sub>4</sub>-4-OC<sub>6</sub>H<sub>4</sub>-4-CH<sub>2</sub>NHCH<sub>2</sub>C<sub>6</sub>H<sub>4</sub>-4-OCH<sub>2</sub>CH<sub>2</sub>CH=CH<sub>2</sub> (0.30 g, 0.39 mmol) was dissolved in CH<sub>2</sub>Cl<sub>2</sub>/MeOH (10 cm<sup>3</sup>/10 cm<sup>3</sup>) at room temperature then 4 M aqueous solution of HCl (30 cm<sup>3</sup>) and MeOH (60 cm<sup>3</sup>) were added to the solution. The stirring the mixture for 5 h at room temperature causes separation of crude product from the solution. The solid product was collected by filtration and washed with MeOH, hexane then Et<sub>2</sub>O and dried under reduced pressure to give [(C<sub>6</sub>H<sub>4</sub>-4-tBu)<sub>3</sub>CC<sub>6</sub>H<sub>4</sub>-4-OC<sub>6</sub>H<sub>4</sub>-4-CH<sub>2</sub>NH<sub>2</sub>CH<sub>2</sub>C<sub>6</sub>H<sub>4</sub>-4-OCH<sub>2</sub>CH<sub>2</sub>CH=CH<sub>2</sub>](Cl) as a white solid (0.30 g, 0.37 mmol, 95%) (Found: C, 81.28; H, 7.91; N, 1.79. C<sub>55</sub>H<sub>64</sub>NO<sub>2</sub>Cl(H<sub>2</sub>O)<sub>0.25</sub> requires C, 81.45; H, 8.02; N, 1.73%); δ<sub>H</sub>(300 MHz; CDCl<sub>3</sub>; r.t.) 1.30 (27 H, s, CH<sub>3</sub>), 2.45 (2 H, dt, *J* 7 and 7, CH<sub>2</sub>CH=CH<sub>2</sub>), 3.78 (2 H, s, NCH<sub>2</sub>), 3.80 (2 H, s, NCH<sub>2</sub>), 3.85 (2 H, t, *J* 7, OCH<sub>2</sub>), 5.07 (1 H, dd, *J* 10 and 2, cis-CH=CH<sub>2</sub>), 5.11 (1 H, dd, *J* 17 and 2, trans-CH=CH<sub>2</sub>), 5.82 (1 H, ddt, *J* 17, 10 and 7, CH=CH<sub>2</sub>), 6.78 (2 H, d, *J* 9, C<sub>6</sub>H<sub>4</sub>), 6.84 (2 H, d, *J* 8, C<sub>6</sub>H<sub>4</sub>), 6.97 (2 H, d, *J* 8, C<sub>6</sub>H<sub>4</sub>), 7.07 (6 H, d, *J* 8, <sup>t</sup>BuC<sub>6</sub>H<sub>4</sub>), 7.12 (2 H, d, *J* 9, C<sub>6</sub>H<sub>4</sub>), 7.24 (6 H, d, *J* 8, <sup>t</sup>BuC<sub>6</sub>H<sub>4</sub>), 7.40 (2 H, d, *J* 9, C<sub>6</sub>H<sub>4</sub>), 7.45 (2 H, d, *J* 8, C<sub>6</sub>H<sub>4</sub>)

and 10.1 (2 H, br s, NH<sub>2</sub>);  $\delta_C$ (100 MHz; CDCl<sub>3</sub>; r.t.) 31.4 (CH<sub>3</sub>), 33.5 (CH<sub>2</sub>CH=CH<sub>2</sub>), 34.4 (C(CH<sub>3</sub>)), 48.0 (NCH<sub>2</sub>), 48.1 (NCH<sub>2</sub>), 63.2 (C(<sup>t</sup>BuC<sub>6</sub>H<sub>4</sub>)<sub>3</sub>), 67.1 (OCH<sub>2</sub>), 114.9, 117.1 (CH<sub>2</sub>CH=CH<sub>2</sub>), 118.0, 118.5, 121.8, 124.1 (<sup>t</sup>BuC<sub>6</sub>H<sub>4</sub>), 130.6 (<sup>t</sup>BuC<sub>6</sub>H<sub>4</sub>), 131.8, 131.9, 132.6, 134.0, 143.0, 143.7, 148.4, 153.6, 158.4 and 159.5.

**AnCH=NC<sub>6</sub>H<sub>4</sub>OCH<sub>2</sub>CH<sub>2</sub>CH=CH<sub>2</sub> (An = 9-anthryl)**

A solution of 9-anthracenecarboxaldehyde (1.1 g, 5.3 mmol) and H<sub>2</sub>NCH<sub>2</sub>C<sub>6</sub>H<sub>4</sub>OCH<sub>2</sub>CH<sub>2</sub>CH=CH<sub>2</sub> (0.92 g, 5.2 mmol) in toluene (50 cm<sup>3</sup>) was heated at 120 °C for 10 h in the presence of MS4A (4 Å molecular sieves, 1.0 g). Evaporation of the solution to dryness produced AnCH=NC<sub>6</sub>H<sub>4</sub>OCH<sub>2</sub>CH<sub>2</sub>CH=CH<sub>2</sub> which was extracted with CH<sub>2</sub>Cl<sub>2</sub>. The solution was filtered to remove MS4A and reprecipitation from CH<sub>2</sub>Cl<sub>2</sub>/hexane at -20 °C gave AnCH=NC<sub>6</sub>H<sub>4</sub>OCH<sub>2</sub>CH<sub>2</sub>CH=CH<sub>2</sub> as a brown solid which was washed with hexane and dried under reduced pressure (1.9 g, 5.2 mmol, quant) (Found: C, 84.72; H, 6.37; N, 3.96. C<sub>26</sub>H<sub>23</sub>NO requires C, 85.45; H, 6.34; N, 3.83%);  $\delta_H$ (300 MHz; C<sub>6</sub>D<sub>6</sub>; r.t.) 2.30 (2 H, dt, *J* 7 and 7, OCH<sub>2</sub>CH<sub>2</sub>), 3.63 (2 H, t, *J* 7, OCH<sub>2</sub>), 4.86 (2 H, s, NCH<sub>2</sub>), 5.00 (1 H, d, *J* 11, =CH<sub>2</sub>), 5.02 (1 H, d, *J* 17, =CH<sub>2</sub>), 5.75 (1 H, ddt, *J* 17, 11 and 7, CH=CH<sub>2</sub>), 6.88 (2 H, d, *J* 9, C<sub>6</sub>H<sub>4</sub>), 7.20-7.30 (4 H, H<sub>2</sub>-An, H<sub>3</sub>-An), 7.36 (2 H, d, *J* 9, C<sub>6</sub>H<sub>4</sub>), 7.76 (2 H, d, *J* 8, H<sub>4</sub>-An), 8.15 (1 H, s, H<sub>10</sub>-An), 8.77 (2 H, d, *J* 9, H<sub>1</sub>-An) and 9.27 (1 H, s, NCH);  $\delta_C$ (75.5 MHz; C<sub>6</sub>D<sub>6</sub>; r.t.) 34.0 (OCH<sub>2</sub>CH<sub>2</sub>), 66.5 (NCH<sub>2</sub>), 67.1 (OCH<sub>2</sub>), 114.9 (C<sub>6</sub>H<sub>4</sub>), 116.8 (=CH<sub>2</sub>), 125.4, 125.6, 126.8, 129.1, 129.5, 129.9, 130.8, 131.7, 132.2 (An), 134.9 (CH=CH<sub>2</sub>), 158.6 (C<sub>6</sub>H<sub>4</sub>) and 160.3 (NCH).

**(C<sub>6</sub>H<sub>3</sub>-3,5-Me<sub>2</sub>)C(=O)NHCH<sub>2</sub>C<sub>6</sub>H<sub>4</sub>-4-OCH<sub>2</sub>CH<sub>2</sub>CH=CH<sub>2</sub>**

To a CH<sub>2</sub>Cl<sub>2</sub> solution (15 cm<sup>3</sup>) containing H<sub>2</sub>NCH<sub>2</sub>C<sub>6</sub>H<sub>4</sub>-4-CH<sub>2</sub>CH<sub>2</sub>CH=CH<sub>2</sub> (1.5 g, 8.6 mmol) and Et<sub>3</sub>N (1.2 g, 12 mmol) was added 3,5-dimethylbenzoyl chloride (1.5 g, 8.6 mmol) at 0 °C. The temperature of the reaction mixture was allowed to rise room temperature during and the mixture was stirred for further 12 h. The reaction mixture was quenched with water and the product was extracted by CH<sub>2</sub>Cl<sub>2</sub>. The separated organic phase was dried over

MgSO<sub>4</sub> and evaporation of the solution gave crude product which was washed with hexane to give (C<sub>6</sub>H<sub>3</sub>-3,5-Me<sub>2</sub>)C(=O)NHCH<sub>2</sub>C<sub>6</sub>H<sub>4</sub>-4-OCH<sub>2</sub>CH<sub>2</sub>CH=CH<sub>2</sub> as a white solid (0.70 g, 2.3 mmol, 26%) (Found: C, 77.60; H, 7.34; N, 4.29. C<sub>20</sub>H<sub>23</sub>NO<sub>2</sub> requires C, 77.64; H, 7.49; N, 4.53%); δ<sub>H</sub>(300 MHz; CDCl<sub>3</sub>; r.t.) 2.34 (6 H, s, CH<sub>3</sub>), 2.54 (2 H, dtt, *J* 6, 6 and 2, CH<sub>2</sub>CH=CH<sub>2</sub>), 4.01 (2 H, t, *J* 6, OCH<sub>2</sub>), 4.56 (2 H, d, *J* 5, NCH<sub>2</sub>), 5.11 (1 H, ddt, *J* 10, 2 and 2, cis-CH=CH<sub>2</sub>), 5.17 (1 H, ddt, *J* 17, 2 and 2, trans-CH=CH<sub>2</sub>), 5.90 (1 H, ddt, *J* 17, 10 and 6, CH=CH<sub>2</sub>), 6.28 (1 H, br s, NH), 6.88 (2 H, d, *J* 8, C<sub>6</sub>H<sub>4</sub>), 7.12 (1 H, s, para-C<sub>6</sub>H<sub>3</sub>), 7.27 (2 H, d, *J* 8, C<sub>6</sub>H<sub>4</sub>) and 7.37 (2 H, s, ortho-C<sub>6</sub>H<sub>3</sub>); δ<sub>H</sub>(100 MHz; CDCl<sub>3</sub>; r.t.) 21.2 (CH<sub>3</sub>), 33.6 (CH<sub>2</sub>CH=CH<sub>2</sub>), 43.5 (NCH<sub>2</sub>), 67.2 (OCH<sub>2</sub>), 114.7, 116.9 (CH<sub>2</sub>CH=CH<sub>2</sub>), 124.6, 129.1, 130.3, 132.9, 134.2, 134.3, 138.1, 158.2 and 167.5 (C=O).

**(C<sub>6</sub>H<sub>3</sub>-3,5-Me<sub>2</sub>)CH<sub>2</sub>NHCH<sub>2</sub>C<sub>6</sub>H<sub>4</sub>-4-OCH<sub>2</sub>CH<sub>2</sub>CH=CH<sub>2</sub>**

(C<sub>6</sub>H<sub>3</sub>-3,5-Me<sub>2</sub>)C(=O)NHCH<sub>2</sub>C<sub>6</sub>H<sub>4</sub>-4-OCH<sub>2</sub>CH<sub>2</sub>CH=CH<sub>2</sub> (1.6 g, 5.0 mmol) was dissolved in THF (60 cm<sup>3</sup>) at room temperature then the solution was cooled to 0 °C. LiAlH<sub>4</sub> (0.76 g, 20 mmol) was added to the solution at 0 °C and the mixture was stirred for 12 h under reflux condition then the solution was cooled to room temperature. The reaction mixture was quenched with 3 M aqueous solution of KOH (10 cm<sup>3</sup>) and the product was extracted by CH<sub>2</sub>Cl<sub>2</sub>. The separated organic phase was dried over MgSO<sub>4</sub> and evaporation of the solution gave crude product which was purified by SiO<sub>2</sub> column chromatography (eluent: hexane/AcOEt 6:1) to give (C<sub>6</sub>H<sub>3</sub>-3,5-Me<sub>2</sub>)CH<sub>2</sub>NHCH<sub>2</sub>C<sub>6</sub>H<sub>4</sub>-4-OCH<sub>2</sub>CH<sub>2</sub>CH=CH<sub>2</sub> as a yellow oil (0.30 g, 1.0 mmol, 20%) (Found: C, 81.11; H, 8.34; N, 4.78. C<sub>20</sub>H<sub>25</sub>NO requires C, 81.31; H, 8.53; N, 4.74%); δ<sub>H</sub>(300 MHz; CDCl<sub>3</sub>; r.t.) 2.31 (6 H, s, CH<sub>3</sub>), 2.54 (2 H, dtt, *J* 7, 7 and 2, CH<sub>2</sub>CH=CH<sub>2</sub>), 3.72 (2 H, s, NCH<sub>2</sub>), 3.74 (2 H, s, NCH<sub>2</sub>), 4.01 (2 H, t, *J* 7, OCH<sub>2</sub>), 5.11 (1 H, ddt, *J* 10, 2 and 2, cis-CH=CH<sub>2</sub>), 5.18 (1 H, ddt, *J* 17, 2 and 2, trans-CH=CH<sub>2</sub>), 5.91 (1 H, ddt, *J* 17, 10 and 7, CH=CH<sub>2</sub>), 6.87 (2 H, d, *J* 9, C<sub>6</sub>H<sub>4</sub>), 6.89 (1 H, s, para-C<sub>6</sub>H<sub>3</sub>), 6.95 (2 H, s, ortho-C<sub>6</sub>H<sub>3</sub>) and 7.27 (2 H, d, *J* 9, C<sub>6</sub>H<sub>4</sub>); δ<sub>C</sub>(75.5 MHz; CDCl<sub>3</sub>; r.t.) 21.2 (CH<sub>3</sub>), 33.6

(CH<sub>2</sub>CH=CH<sub>2</sub>), 52.6 (NCH<sub>2</sub>), 53.0 (NCH<sub>2</sub>), 67.1 (OCH<sub>2</sub>), 114.3, 116.9, 125.9, 128.4, 129.2, 132.4, 134.4, 137.8, 140.1 and 157.8.

**CH<sub>2</sub>=CHCOOC<sub>6</sub>H<sub>4</sub>-4-C(C<sub>6</sub>H<sub>4</sub>-4-tBu)<sub>3</sub>**

To a solution of (C<sub>6</sub>H<sub>4</sub>-4-tBu)<sub>3</sub>CC<sub>6</sub>H<sub>4</sub>-4-OH (1.3 g, 6.0 mmol) and Et<sub>3</sub>N (0.42 cm<sup>3</sup>, 3.0 mmol) in CH<sub>2</sub>Cl<sub>2</sub> (5.0 cm<sup>3</sup>) was added acryloyl chloride (0.25 cm<sup>3</sup>, 3.0 mmol) in CH<sub>2</sub>Cl<sub>2</sub> (1.0 cm<sup>3</sup>). After stirring the mixture for 1 h at room temperature, the solution was diluted by CH<sub>2</sub>Cl<sub>2</sub> and the insoluble solid was removed by filtration. Removal of solvent by evaporation gave CH<sub>2</sub>=CHCOOC<sub>6</sub>H<sub>4</sub>-4-C(C<sub>6</sub>H<sub>4</sub>-4-tBu)<sub>3</sub> as a white solid which was washed with Et<sub>2</sub>O, water and dried under reduced pressure (1.1 g, 2.0 mmol, 79 mmol) (Found: C, 84.53; H, 8.53. C<sub>40</sub>H<sub>46</sub>O<sub>2</sub>(H<sub>2</sub>O)<sub>0.5</sub> requires C, 84.61; H, 8.34%); δ<sub>H</sub>(300 MHz; CDCl<sub>3</sub>; r.t.) 1.30 (27 H, s, CH<sub>3</sub>), 5.99 (1 H, dd, *J* 11 and 2, cis-CH<sub>2</sub>=CH), 6.31 (1 H, dd, *J* 17 and 11, CH<sub>2</sub>=CH), 6.59 (1 H, dd, *J* 17 and 2, trans-CH<sub>2</sub>=CH), 7.00 (2 H, d, *J* 9, C<sub>6</sub>H<sub>4</sub>), 7.06-7.16 (6 H, C<sub>6</sub>H<sub>4</sub>) and 7.19-7.29 (10 H, C<sub>6</sub>H<sub>4</sub>); δ<sub>C</sub>(75.5 MHz; CDCl<sub>3</sub>; r.t.) 31.3 (CH<sub>3</sub>), 34.3 (CH<sub>2</sub>), 63.3 (C(CH<sub>3</sub>)<sub>3</sub>), 119.9, 124.1, 128.0, 130.7, 132.2, 132.4, 143.7, 144.9, 148.3, 148.4 and 164.5 (C=O); *R*<sub>f</sub> 0.41 (hexane/AcOEt 5:1).

**(C<sub>6</sub>H<sub>4</sub>-4-tBu)<sub>3</sub>CC<sub>6</sub>H<sub>4</sub>-4-O(CH<sub>2</sub>)<sub>11</sub>OTHP (THP = 2-tetrahydropyranyl).** A DMF solution (18 cm<sup>3</sup>) containing (C<sub>6</sub>H<sub>4</sub>-4-tBu)<sub>3</sub>CC<sub>6</sub>H<sub>4</sub>-4-OH (0.50 g, 1.0 mmol) and K<sub>2</sub>CO<sub>3</sub> (1.4 g, 10 mmol) was stirred for 30 min at 80 °C and Br(CH<sub>2</sub>)<sub>11</sub>OTHP (1.7 g, 5.0 mmol) was added to the solution and stirred for further 16 h. After the evaporation of solvent, the crude product was dissolved in CH<sub>2</sub>Cl<sub>2</sub> and the precipitate was removed by filtration. The filtrate was washed with sat. NH<sub>4</sub>Cl(aq), dried over MgSO<sub>4</sub>, and evaporated. Purification by SiO<sub>2</sub> column chromatography (eluent: hexane/AcOEt 10:1) gave (C<sub>6</sub>H<sub>4</sub>-4-tBu)<sub>3</sub>CC<sub>6</sub>H<sub>4</sub>-4-O(CH<sub>2</sub>)<sub>11</sub>OTHP as white solid (0.69 g, 0.89 mmol, 91%) (Found: C, 83.77; H, 9.93. C<sub>53</sub>H<sub>74</sub>O<sub>3</sub> requires C, 83.85; H, 9.82%); δ<sub>H</sub>(300 MHz; CDCl<sub>3</sub>; r.t.) 1.30 (27 H, s, CH<sub>3</sub>), 1.28-1.88 (24 H, CH<sub>2</sub>), 3.34-3.43 (1 H, m, OCH<sub>2</sub>), 3.47-3.53 (1 H, m, OCH<sub>2</sub>), 3.69-3.77 (1 H, m, OCH<sub>2</sub>), 3.84-3.94 (3 H, OCH<sub>2</sub>), 4.58 (1 H, t, *J* 4, CH), 6.76 (2 H, d, *J* 9, C<sub>6</sub>H<sub>4</sub>), 7.07 (2 H, d, *J* 9, C<sub>6</sub>H<sub>4</sub>), 7.08 (6 H, d,

$J$  9,  ${}^t\text{BuC}_6\text{H}_4$ ) and 7.23 (6 H, d,  $J$  9,  ${}^t\text{BuC}_6\text{H}_4$ );  $\delta_{\text{H}}$ (100 MHz;  $\text{CDCl}_3$ ; r.t.) 19.8 ( $\text{CH}_2$ ), 25.6 ( $\text{CH}_2$ ), 26.2 ( $\text{CH}_2$ ), 26.3 ( $\text{CH}_2$ ), 29.4-29.6 (6C,  $\text{CH}_2$ ), 29.8 ( $\text{CH}_2$ ), 30.8 ( $\text{CH}_2$ ), 31.4 ( $\text{CH}_3$ ), 34.3 ( $\text{C}(\text{CH}_3)$ ), 62.4 ( $\text{OCH}_2$ ), 63.0 ( $\text{C}({}^t\text{BuC}_6\text{H}_4)_3$ ), 67.7 ( $\text{OCH}_2$ ), 67.8 ( $\text{OCH}_2$ ), 98.8 ( $\text{CH}$ ), 112.9 ( $\text{C}_6\text{H}_4$ ), 123.9 ( ${}^t\text{BuC}_6\text{H}_4$ ), 130.6 ( ${}^t\text{BuC}_6\text{H}_4$ ), 132.1 ( $\text{C}_6\text{H}_4$ ), 139.2, 144.1, 148.1 and 156.8.

**$(\text{C}_6\text{H}_4\text{-4-tBu})_3\text{CC}_6\text{H}_4\text{-4-O}(\text{CH}_2)_{11}\text{OH}$**

To a  $\text{CH}_2\text{Cl}_2/\text{MeOH}$  ( $20\text{ cm}^3/20\text{ cm}^3$ ) solution containing  $(\text{C}_6\text{H}_4\text{-4-tBu})_3\text{CC}_6\text{H}_4\text{-4-O}(\text{CH}_2)_{11}\text{OTHP}$  (0.60 g, 0.79 mmol) was added 4 M  $\text{HCl}(\text{aq})$  ( $4\text{ cm}^3$ ) and stirred for 4 h at room temperature. The solution was participated by addition of  $\text{CH}_2\text{Cl}_2$  and the organic extract was separated, dried over  $\text{MgSO}_4$ , and filtered. The solid obtained by evaporation of the filtrate was washed with hexane to give  $(\text{C}_6\text{H}_4\text{-4-tBu})_3\text{CC}_6\text{H}_4\text{-4-O}(\text{CH}_2)_{11}\text{OH}$  as white solid (0.39 g, 0.58 mmol, 73%) (Found: C, 83.06; H, 9.93.  $\text{C}_{48}\text{H}_{66}\text{O}_2(\text{H}_2\text{O})$  requires C, 83.19; H, 9.89%);  $\delta_{\text{H}}$ (300 MHz;  $\text{CDCl}_3$ ; r.t.) 1.30 (27 H, s,  $\text{CH}_3$ ), 1.30-1.80 (18 H,  $\text{CH}_2$ ), 3.64 (2 H, t,  $J$  7,  $\text{OCH}_2$ ), 3.92 (2 H, t,  $J$  7,  $\text{OCH}_2$ ), 6.75 (2 H, d,  $J$  9,  $\text{C}_6\text{H}_4$ ), 7.07 (2 H, d,  $J$  9,  $\text{C}_6\text{H}_4$ ), 7.08 (6 H, d,  $J$  9,  ${}^t\text{BuC}_6\text{H}_4$ ) and 7.23 (6 H, d,  $J$  9,  ${}^t\text{BuC}_6\text{H}_4$ );  $\delta_{\text{C}}$ (100 MHz;  $\text{CDCl}_3$ ; r.t.) 25.8 ( $\text{CH}_2$ ), 26.2 ( $\text{CH}_2$ ), 26.3 ( $\text{CH}_2$ ), 29.4-29.6 (6C,  $\text{CH}_2$ ), 29.8 ( $\text{CH}_2$ ), 30.8 ( $\text{CH}_2$ ), 31.4 ( $\text{CH}_3$ ), 32.8 ( $\text{C}(\text{CH}_3)$ ), 34.3 ( $\text{CH}_3$ ), 62.4 ( $\text{OCH}_2$ ), 63.0 ( $\text{C}({}^t\text{BuC}_6\text{H}_4)_3$ ), 67.7 ( $\text{OCH}_2$ ), 67.8 ( $\text{OCH}_2$ ), 112.8 ( $\text{C}_6\text{H}_4$ ), 123.9 ( ${}^t\text{BuC}_6\text{H}_4$ ), 130.6 ( ${}^t\text{BuC}_6\text{H}_4$ ), 132.1 ( $\text{C}_6\text{H}_4$ ), 139.2, 144.1, 148.1 and 156.8.

**$(\text{C}_6\text{H}_4\text{-4-tBu})_3\text{CC}_6\text{H}_4\text{-4-O}(\text{CH}_2)_{11}\text{O}(\text{CH}_2)_{11}\text{OTHP}$**

A toluene ( $2.0\text{ cm}^3$ ) solution containing  $(\text{C}_6\text{H}_4\text{-4-tBu})_3\text{CC}_6\text{H}_4\text{-4-O}(\text{CH}_2)_{11}\text{OH}$  (0.14 g, 0.20 mmol) and  $\text{NaH}$  (0.10 g, 4.0 mmol) was refluxed for 3 h then  $\text{Br}(\text{CH}_2)_{11}\text{OTHP}$  (0.080 g, 0.24 mmol) was added to the solution and refluxed for further 21 h. The reaction mixture was quenched with water and the product was extracted by  $\text{CH}_2\text{Cl}_2$ . The separated organic phase was washed with water, dried over  $\text{MgSO}_4$ , filtered, and evaporated. The crude product was purified by  $\text{SiO}_2$  column chromatography (eluent: hexane/ $\text{AcOEt}$  10:1) and washing with

methanol to give  $(C_6H_4-4-tBu)_3CC_6H_4-4-O(CH_2)_{11}O(CH_2)_{11}OTHP$  as white solid (0.12 g, 0.13 mmol, 66%);  $\delta_H$ (300 MHz;  $CDCl_3$ ; r.t.) 1.30 (27 H, s,  $CH_3$ ), 1.30-1.87 (42 H,  $CH_2$ ), 3.34-3.42 (1 H, m,  $OCH_2$ ), 3.39 (4 H,  $OCH_2$ ), 3.46-3.53 (1 H, m,  $OCH_2$ ), 3.69-3.77 (1 H, m,  $OCH_2$ ), 3.84-3.87 (1 H, m,  $OCH_2$ ), 3.92 (2 H, t,  $J$  7,  $OCH_2$ ), 4.58 (1 H, t,  $J$  4, CH), 6.76 (2 H, d,  $J$  9,  $C_6H_4$ ), 7.07 (2 H, d,  $J$  9,  $C_6H_4$ ), 7.08 (6 H, d,  $J$  9,  ${}^tBuC_6H_4$ ) and 7.23 (6 H, d,  $J$  9,  ${}^tBuC_6H_4$ );  $\delta_C$ (100 MHz;  $CDCl_3$ ; r.t.) 19.8 ( $CH_2$ ), 25.6 ( $CH_2$ ), 26.2-26.3 (4C,  $CH_2$ ), 26.4 ( $CH_2$ ), 29.4 (2 C,  $CH_2$ ), 29.6 (9 C,  $CH_2$ ), 29.8 (2 C,  $CH_2$ ), 30.8 ( $CH_2$ ), 31.4 ( $CH_3$ ), 34.3 ( $C(CH_3)$ ), 62.3 ( $OCH_2$ ), 63.0 ( $C({}^tBuC_6H_4)_3$ ), 67.7 ( $OCH_2$ ), 67.8 ( $OCH_2$ ), 71.0 (2 C,  $OCH_2$ ), 98.8 (CH), 112.8 ( $C_6H_4$ ), 123.9 ( ${}^tBuC_6H_4$ ), 130.6 ( ${}^tBuC_6H_4$ ), 132.1 ( $C_6H_4$ ), 139.2, 144.1, 148.1 and 156.8;  $m/z$  (HRFABMS) 928.7303 ( $[M+H]^+$ .  $C_{64}H_{96}O_4$  requires 928.7309).

#### **$(C_6H_4-4-tBu)_3CC_6H_4-4-O(CH_2)_{11}O(CH_2)_{11}OH$**

To a  $CH_2Cl_2/MeOH$  (20  $cm^3/30$   $cm^3$ ) solution of  $(C_6H_4-4-tBu)_3CC_6H_4-4-O(CH_2)_{11}O(CH_2)_{11}OTHP$  (0.090 g, 0.10 mmol) was added 4 M  $HCl(aq)$  (3.0  $cm^3$ ) and stirred for 3 h at room temperature. The solution was participated by addition of  $CH_2Cl_2$  and the organic layer was separated, washed with water, dried over  $MgSO_4$ , filtered, and evaporated. The crude product was washed with methanol to give  $(C_6H_4-4-tBu)_3CC_6H_4-4-O(CH_2)_{11}O(CH_2)_{11}OH$  as white solid (0.037 g, 0.044 mmol, 44%) (Found: C, 82.99; H, 10.68.  $C_{59}H_{88}O_3(H_2O)_{0.5}$  requires C, 82.95; H, 10.50%);  $\delta_H$ (300 MHz;  $CDCl_3$ ; r.t.) 1.30 (27 H, s,  $CH_3$ ), 1.30-1.78 (32 H,  $CH_2$ ), 3.39 (4 H, t,  $J$  7,  $OCH_2$ ), 3.63 (2 H, t,  $J$  7,  $OCH_2$ ), 3.92 (2 H, t,  $J$  7,  $OCH_2$ ), 6.76 (2 H, d,  $J$  9,  $C_6H_4$ ), 7.07 (2 H, d,  $J$  9,  $C_6H_4$ ), 7.08 (6 H, d,  $J$  9,  ${}^tBuC_6H_4$ ) and 7.23 (6 H, d,  $J$  9,  ${}^tBuC_6H_4$ );  $\delta_C$ (100 MHz;  $CDCl_3$ ; r.t.) 26.2 ( $CH_2$ ), 26.3 (2 C,  $CH_2$ ), 29.4-29.6 (11 C,  $CH_2$ ), 29.8 (2 C,  $CH_2$ ), 31.4 ( $CH_3$ ), 34.3 ( $C(CH_3)$ ), 63.0 ( $C({}^tBuC_6H_4)_3$ ), 67.8 ( $OCH_2$ ), 71.0 ( $OCH_2$ ), 112.8 ( $C_6H_4$ ), 123.9 ( ${}^tBuC_6H_4$ ), 130.6 ( ${}^tBuC_6H_4$ ), 132.1 ( $C_6H_4$ ), 139.2, 144.1, 148.1 and 156.8.



**(C<sub>6</sub>H<sub>4</sub>-4-tBu)<sub>3</sub>CC<sub>6</sub>H<sub>4</sub>-4-O(CH<sub>2</sub>)<sub>11</sub>O(CH<sub>2</sub>)<sub>11</sub>OCOCH=CH<sub>2</sub>**

To a solution of (C<sub>6</sub>H<sub>4</sub>-4-tBu)<sub>3</sub>CC<sub>6</sub>H<sub>4</sub>-4-O(CH<sub>2</sub>)<sub>11</sub>O(CH<sub>2</sub>)<sub>11</sub>OH (0.42 g, 0.50 mmol) and Et<sub>3</sub>N (0.077 cm<sup>3</sup>, 0.55 mmol) in CH<sub>2</sub>Cl<sub>2</sub> (5.0 cm<sup>3</sup>) was added acryloyl chloride (0.045 cm<sup>3</sup>, 0.55 mmol). After stirring the mixture for 3 h at room temperature, the solution was diluted by CH<sub>2</sub>Cl<sub>2</sub>. Removal of solvent by evaporation gave (C<sub>6</sub>H<sub>4</sub>-4-tBu)<sub>3</sub>CC<sub>6</sub>H<sub>4</sub>-4-O(CH<sub>2</sub>)<sub>11</sub>O(CH<sub>2</sub>)<sub>11</sub>OCOCH=CH<sub>2</sub> as a white solid which was washed with methanol, (0.41 g, 0.45 mmol, 90%); δ<sub>H</sub>(300 MHz; CDCl<sub>3</sub>; r.t.) 1.29 (27 H, s, CH<sub>3</sub>), 1.29-1.78 (36 H, CH<sub>2</sub>), 3.38 (4 H, t, *J* 7, OCH<sub>2</sub>), 3.91 (2 H, t, *J* 7, OCH<sub>2</sub>), 4.14 (2 H, t, *J* 7, OCH<sub>2</sub>), 5.81 (1 H, dd, *J* 11 and 1, cis-CH=CH<sub>2</sub>), 6.16 (1 H, dd, *J* 17 and 11, CH=CH<sub>2</sub>), 6.40 (1 H, dd, *J* 17 and 1, trans-CH<sub>2</sub>=CH), 6.75 (2 H, d, *J* 9, C<sub>6</sub>H<sub>4</sub>), 7.07 (2 H, d, *J* 9, C<sub>6</sub>H<sub>4</sub>), 7.08 (6 H, d, *J* 9, <sup>t</sup>BuC<sub>6</sub>H<sub>4</sub>) and 7.24 (6 H, d, *J* 9, <sup>t</sup>BuC<sub>6</sub>H<sub>4</sub>); δ<sub>C</sub>(100 MHz; CDCl<sub>3</sub>; r.t.) 26.0 (CH<sub>2</sub>), 26.2 (3 C, CH<sub>2</sub>), 28.7 (CH<sub>2</sub>), 29.3-29.6 (9 C, CH<sub>2</sub>), 29.6 (2 C, CH<sub>2</sub>), 31.4 (CH<sub>3</sub>), 34.3 (C(CH<sub>3</sub>)), 63.0 (C(<sup>t</sup>BuC<sub>6</sub>H<sub>4</sub>)<sub>3</sub>), 64.7 (OCH<sub>2</sub>), 67.8 (OCH<sub>2</sub>), 71.0 (2 C, OCH<sub>2</sub>), 112.8 (C<sub>6</sub>H<sub>4</sub>), 123.9 (<sup>t</sup>BuC<sub>6</sub>H<sub>4</sub>), 128.6, 130.3, 130.6 (<sup>t</sup>BuC<sub>6</sub>H<sub>4</sub>), 132.1 (C<sub>6</sub>H<sub>4</sub>), 139.2, 144.1, 148.1, 156.8 and 166.2 (C=O); *m/z* (HRFABMS) 898.6822 ([M+H]<sup>+</sup>. C<sub>64</sub>H<sub>90</sub>O<sub>4</sub> requires 898.6839).

**AnOCOCH=CH<sub>2</sub>**

The following manipulation was conducted under Ar atmosphere. To a solution of anthrone (4.9 g, 25 mmol) and NEt<sub>3</sub> (3.8 cm<sup>3</sup>, 27 mmol) in CH<sub>2</sub>Cl<sub>2</sub> (5.0 cm<sup>3</sup>) was added a CH<sub>2</sub>Cl<sub>2</sub> solution (5.0 cm<sup>3</sup>) of acryloyl chloride (2.2 cm<sup>3</sup>, 27 mmol) at 0 °C under Ar and then the temperature of the solution was allowed to rise room temperature over 3 h. The insoluble solid formed during the reaction was removed by filtration. The solution was washed with an aqueous solution of 0.1 M NaOH and extracted by CH<sub>2</sub>Cl<sub>2</sub>. The separated organic layer was dried over MgSO<sub>4</sub>, filtered, and evaporated. The product was purified by chromatography on silica gel (eluent: CH<sub>2</sub>Cl<sub>2</sub>) to give AnOCOCH=CH<sub>2</sub> as yellow solid (2.3 g, 9.3 mmol, 37%) (Found: C, 81.94; H, 4.94. C<sub>17</sub>H<sub>12</sub>O<sub>2</sub> requires C, 82.24; H, 4.87%); δ<sub>H</sub>(300 MHz; CDCl<sub>3</sub>; r.t.)

6.23 (1 H, dd, *J* 10 and 1, CH<sub>2</sub>), 6.66 (1 H, dd, *J* 17 and 10, CH=CH<sub>2</sub>), 6.89 (1 H, dd, *J* 18 and 1, CH<sub>2</sub>), 7.48-7.54 (4 H, H1-An, H4-An), 7.95 (2 H, m, H2-An or H3-An), 8.04 (2 H, m, H2-An or H3-An) and 8.40 (1 H, s, H10-An);  $\delta_{\text{C}}$ (75.5 MHz; CDCl<sub>3</sub>; r.t.) 121.3, 123.8, 124.7, 125.5, 126.2, 127.3, 128.3, 131.8, 133.6, 141.8 and 164.6 (C=O); *R*<sub>f</sub> 0.49 (CH<sub>2</sub>Cl<sub>2</sub>).

### **AnCH<sub>2</sub>OCOCH=CH<sub>2</sub>**

9-anthrylmethyl acrylate was prepared by according to literature method with slight modifications.<sup>1</sup> To a 150 cm<sup>3</sup> of methanol solution of anthracene-9-carbaldehyde (1.0 g, 5.0 mmol) was added NaBH<sub>4</sub> (1.5 g, 40 mmol) and the mixture was stirred for 11 h at room temperature before the quenching with sat. NH<sub>4</sub>Cl(aq). The product was extracted with CH<sub>2</sub>Cl<sub>2</sub>, washed with water, dried over MgSO<sub>4</sub>, filtered, and evaporation of the solvent yield anthracene-9-methanol (0.80 g, 3.8 mmol, 77%). To a CH<sub>2</sub>Cl<sub>2</sub>/Et<sub>3</sub>N (2.0 cm<sup>3</sup>/0.3 cm<sup>3</sup>) solution of anthracene-9-methanol (0.40 g, 2.0 mmol) was added acryloyl chloride (0.20 cm<sup>3</sup>, 2.2 mmol) in CH<sub>2</sub>Cl<sub>2</sub> (0.5 cm<sup>3</sup>) at 0 °C. The resulting solution was stirred for 1 h and then the temperature was allowed to raise room temperature. The solution was washed with water and extracted by CH<sub>2</sub>Cl<sub>2</sub>. The separated organic layer was dried over MgSO<sub>4</sub>, filtered, and evaporated. The product was purified by SiO<sub>2</sub> column chromatography (eluent: hexane/AcOEt 5:1) to yield 9-anthrylmethyl acrylate (0.15 g, 0.56 mmol, 28%); *R*<sub>f</sub> 0.38 (hexane/AcOEt 5:1).

### **[{AnCH<sub>2</sub>NH<sub>2</sub>CH<sub>2</sub>C<sub>6</sub>H<sub>4</sub>-4-OCH<sub>2</sub>CH<sub>2</sub>CH=CHCOOC<sub>6</sub>H<sub>4</sub>-4-C(C<sub>6</sub>H<sub>4</sub>-4-tBu)<sub>3</sub>}(1)](BAR<sub>F</sub>)**

#### **(12b)**

**3** (124 mg, 0.10 mmol) and **1** (61 mg, 0.11 mmol) was dissolved in CH<sub>2</sub>Cl<sub>2</sub> (2.0 cm<sup>3</sup>), followed by addition of CH<sub>2</sub>=CHCOOC<sub>6</sub>H<sub>4</sub>-4-C(C<sub>6</sub>H<sub>4</sub>-4-tBu)<sub>3</sub> (111 mg, 0.20 mmol) and a Ru-carbene complex ((H<sub>2</sub>IMes)(PCy<sub>3</sub>)Cl<sub>2</sub>Ru=CHPh) (4.2 mg, 5.0 × 10<sup>-3</sup> mmol). The mixture was refluxed for 14 h and the solvent was removed by evaporation to give a brown oil. The crude product was purified by preparative HPLC (CHCl<sub>3</sub>) to give **12b** as a yellow solid (65

mg, 0.065 mmol, 65%) (Found: C, 63.85; H, 5.27; N, 0.62. C<sub>124</sub>H<sub>116</sub>BF<sub>24</sub>FeNO<sub>11</sub>(H<sub>2</sub>O) requires C, 63.73; H, 5.09; N, 0.60%);  $\delta_{\text{H}}$ (300 MHz; CDCl<sub>3</sub>; r.t.) 1.33 (27 H, s, CH<sub>3</sub>), 2.78 (2 H, dt, *J* 6 and 6, CH<sub>2</sub>CH=CH), 3.30-4.25 (32 H, C<sub>5</sub>H<sub>4</sub>, OCH<sub>2</sub>-Crown), 4.13 (2 H, t, *J* 6, OCH<sub>2</sub>-Axle), 5.26 (2 H, m, NCH<sub>2</sub>), 5.69 (2 H, m, NCH<sub>2</sub>), 5.75 (2 H, m, C<sub>6</sub>H<sub>4</sub>-Crown), 6.18 (1 H, d, *J* 16, CH<sub>2</sub>CH=CH), 6.56 (2 H, m, C<sub>6</sub>H<sub>4</sub>-Crown), 6.98-7.03 (4 H, m, C<sub>6</sub>H<sub>4</sub>-Axle), 7.13 (6 H, d, *J* 9, <sup>t</sup>Bu-C<sub>6</sub>H<sub>4</sub>), 7.24-7.28 (9 H, <sup>t</sup>Bu-C<sub>6</sub>H<sub>4</sub>, C<sub>6</sub>H<sub>4</sub>-Axle, CH<sub>2</sub>CH=CH), 7.45 (2 H, dd, *J* 7 and 8, H<sub>3</sub>-An), 7.58 (4 H, s, para-C<sub>6</sub>H<sub>3</sub>), 7.55-7.61 (4 H, H<sub>2</sub>-An, C<sub>6</sub>H<sub>4</sub>-Axle), 7.78 (8 H, br s, ortho-C<sub>6</sub>H<sub>3</sub>), 7.86 (2 H, d, *J* 8, H<sub>4</sub>-An), 7.84 (2 H, br s, NH<sub>2</sub>), 8.14 (1 H, s, H<sub>10</sub>-An) and 8.46 (2 H, d, *J* 9, H<sub>1</sub>-An);  $\delta_{\text{C}}$ (100 MHz; CDCl<sub>3</sub>; r.t.) 31.4 (CH<sub>3</sub>), 32.1 (CH<sub>2</sub>CH=CH), 34.3 (C(CH<sub>3</sub>)<sub>3</sub>), 45.7 (NCH<sub>2</sub>), 52.3 (NCH<sub>2</sub>), 55.8 (C<sub>5</sub>H<sub>4</sub>), 57.3 (C<sub>5</sub>H<sub>4</sub>), 62.5 (C<sub>5</sub>H<sub>4</sub>), 62.7 (C<sub>5</sub>H<sub>4</sub>), 63.4 (C(<sup>t</sup>Bu-C<sub>6</sub>H<sub>4</sub>)<sub>3</sub>), 65.8 (OCH<sub>2</sub>-Axle), 67.7 (CH<sub>2</sub>-Crown), 70.0 (CH<sub>2</sub>-Crown), 70.3 (CH<sub>2</sub>-Crown), 70.5 (CH<sub>2</sub>-Crown), 71.2 (CH<sub>2</sub>-Crown), 71.3 (CH<sub>2</sub>-Crown), 110.8 (C<sub>6</sub>H<sub>4</sub>-Crown), 114.6 (C<sub>6</sub>H<sub>4</sub>-Axle), 117.4 (para-C<sub>6</sub>H<sub>3</sub>), 119.9 (C<sub>6</sub>H<sub>4</sub>-Axle), 120.4, 121.3 (C<sub>6</sub>H<sub>4</sub>-Crown), 122.9 (CH<sub>2</sub>CH=CH), 123.6 (C<sub>1</sub>-An), 124.1 (<sup>t</sup>Bu-C<sub>6</sub>H<sub>4</sub>), 124.4, 124.5 (quintet, *J*(FC) 271, CF<sub>3</sub>), 124.9 (C<sub>3</sub>-An), 127.1 (C<sub>6</sub>H<sub>4</sub>-Axle or C<sub>2</sub>-An), 128.2 (C<sub>6</sub>H<sub>4</sub>-Axle or C<sub>2</sub>-An), 128.8 (quintet, *J*(FC) 31, CCF<sub>3</sub>), 129.5 (C<sub>4</sub>-An), 130.5, 130.6 (<sup>t</sup>Bu-C<sub>6</sub>H<sub>4</sub>), 130.8, 131.1 (C<sub>10</sub>-An), 132.1 (C<sub>6</sub>H<sub>4</sub>-Axle), 134.7 (ortho-C<sub>6</sub>H<sub>3</sub>), 143.6, 144.8, 144.9, 146.6 (CH<sub>2</sub>CH=CH), 148.3, 148.4, 158.9 (C<sub>6</sub>H<sub>4</sub>-Axle), 161.6 (quintet, *J*(BC) 50, BC) and 164.5 (C=O).

**[(1){AnCH<sub>2</sub>NH<sub>2</sub>CH<sub>2</sub>C<sub>6</sub>H<sub>4</sub>-4-OCH<sub>2</sub>CH<sub>2</sub>CH=CHCOO(CH<sub>2</sub>)<sub>11</sub>O(CH<sub>2</sub>)<sub>11</sub>OC<sub>6</sub>H<sub>4</sub>-4-C(C<sub>6</sub>H<sub>4</sub>-4-tBu)<sub>3</sub>]}](BAr<sub>F</sub>) (12c)**

**3** (123 mg, 0.10 mmol) and **1** (61 mg, 0.11 mmol) was dissolved in CH<sub>2</sub>Cl<sub>2</sub> (2.0 cm<sup>3</sup>), followed by addition of (C<sub>6</sub>H<sub>4</sub>-4-tBu)<sub>3</sub>CC<sub>6</sub>H<sub>4</sub>-4-O(CH<sub>2</sub>)<sub>11</sub>O(CH<sub>2</sub>)<sub>11</sub>OCOCH=CH<sub>2</sub> (99 mg, 0.11 mmol) and a Ru-carbene complex ((H<sub>2</sub>IMes)Cl<sub>2</sub>Ru=CHC<sub>6</sub>H<sub>4</sub>-2-O<sup>i</sup>Pr) (4.2 mg, 5.0 × 10<sup>-3</sup> mmol). The mixture was refluxed for 14 h and the solvent was removed by evaporation to give brown oil. The crude product was purified by preparative HPLC (CHCl<sub>3</sub>) to give **12c** as

a yellow solid (113 mg, 0.042 mmol, 42%);  $\delta_{\text{H}}$ (300 MHz; CDCl<sub>3</sub>; r.t.) 1.29 (27 H, s, CH<sub>3</sub>), 1.29-1.80 (36 H, CH<sub>2</sub>), 2.70 (2 H, m, CH<sub>2</sub>CH=CH), 3.31-4.70 (34 H, OCH<sub>2</sub>, C<sub>5</sub>H<sub>4</sub>), 3.40 (4 H, OCH<sub>2</sub>), 3.94 (2 H, t, *J* 7, OCH<sub>2</sub>), 4.13 (2 H, t, *J* 7, OCH<sub>2</sub>), 5.18 (2 H, m, NCH<sub>2</sub>), 5.56 (2 H, m, NCH<sub>2</sub>), 5.72 (2 H, m, C<sub>6</sub>H<sub>4</sub>-Crown), 5.98 (1 H, d, *J* 16, CH=CHCH<sub>2</sub>), 6.54 (2 H, m, C<sub>6</sub>H<sub>4</sub>-Crown), 6.78 (2 H, d, *J* 9, C<sub>6</sub>H<sub>4</sub>C(<sup>t</sup>BuC<sub>6</sub>H<sub>4</sub>)), 6.96 (2 H, m, C<sub>6</sub>H<sub>4</sub>CH<sub>2</sub>N), 7.03 (1 H, m, CH=CHCH<sub>2</sub>), 7.10 (2 H, d, *J* 9, C<sub>6</sub>H<sub>4</sub>C(<sup>t</sup>BuC<sub>6</sub>H<sub>4</sub>)), 7.11 (6 H, d, *J* 8, <sup>t</sup>BuC<sub>6</sub>H<sub>4</sub>), 7.25 (6 H, d, *J* 8, <sup>t</sup>BuC<sub>6</sub>H<sub>4</sub>), 7.46 (2 H, m, C<sub>6</sub>H<sub>4</sub>CH<sub>2</sub>N), 7.56 (4 H, s, para-C<sub>6</sub>H<sub>3</sub>(CF<sub>3</sub>)<sub>2</sub>), 7.43-7.60 (4 H, H2-An, H3-An), 7.76 (8 H, br s, ortho-C<sub>6</sub>H<sub>3</sub>(CF<sub>3</sub>)<sub>2</sub>), 7.80 (2 H, br s, NH<sub>2</sub>), 7.84 (2 H, d, *J* 8, H1 or 4H-An), 8.11 (1 H, s, H10-An) and 8.41 (2 H, m, H1 or H4-An);  $\delta_{\text{C}}$ (100 MHz; CDCl<sub>3</sub>; r.t.) 25.9 (CH<sub>2</sub>), 26.2 (3 C, CH<sub>2</sub>), 28.7 (CH<sub>2</sub>), 29.3 (CH<sub>2</sub>), 29.4 (CH<sub>2</sub>), 29.5-29.6 (9 C, CH<sub>2</sub>), 29.8 (2 C, CH<sub>2</sub>), 31.4 (CH<sub>3</sub>), 31.9 (CH<sub>2</sub>), 34.3 (C(CH<sub>3</sub>)), 45.4 (NCH<sub>2</sub>), 52.3 (NCH<sub>2</sub>), 63.0 (C(<sup>t</sup>BuC<sub>6</sub>H<sub>4</sub>)<sub>3</sub>), 64.6 (OCH<sub>2</sub>-Axle), 66.0 (OCH<sub>2</sub>), 67.6 (OCH<sub>2</sub>), 67.8 (OCH<sub>2</sub>), 70.2 (2 C, OCH<sub>2</sub>), 70.9 (2 C, OCH<sub>2</sub>-Axle), 71.1 (OCH<sub>2</sub>), 71.3 (2 C, OCH<sub>2</sub>), 110.8 (C<sub>6</sub>H<sub>4</sub>-Crown), 112.8 (C<sub>6</sub>H<sub>4</sub>C(<sup>t</sup>BuC<sub>6</sub>H<sub>4</sub>)), 114.6 (C<sub>6</sub>H<sub>4</sub>CH<sub>2</sub>N), 117.4 (para-C<sub>6</sub>H<sub>3</sub>(CF<sub>3</sub>)<sub>2</sub>), 120.2, 121.3 (C<sub>6</sub>H<sub>4</sub>-crown), 123.5 (CH=CHCH<sub>2</sub>), 123.6 (C1 or C4-An), 123.9 (<sup>t</sup>BuC<sub>6</sub>H<sub>4</sub>), 124.1, 124.5 (quintet, *J*(FC) 271, CF<sub>3</sub>), 124.9 (C2 or C3-An), 127.1 (C<sub>6</sub>H<sub>4</sub>CH<sub>2</sub>N), 128.2 (C2 or C3-An), 128.7 (quintet, *J*(FC) 31, CCF<sub>3</sub>), 129.5 (C1 or C4-An), 130.4, 130.6 (<sup>t</sup>BuC<sub>6</sub>H<sub>4</sub>), 131.0 (C10-An), 132.1 (C<sub>6</sub>H<sub>4</sub>C(<sup>t</sup>BuC<sub>6</sub>H<sub>4</sub>)), 134.7 (ortho-C<sub>6</sub>H<sub>3</sub>(CF<sub>3</sub>)<sub>2</sub>), 139.2, 144.1, 144.3 (CH=CHCH<sub>2</sub>), 144.8, 148.1, 156.8, 158.9, 161.5 (quintet, *J*(BC) 50, BC) and 166.3 (C=O); *m/z* (HRFABMS) 1795.0244 ([M - BAr<sub>F</sub>]<sup>+</sup>. C<sub>114</sub>H<sub>148</sub>FeNO<sub>13</sub> requires 1795.0300).

**[(1)(AnCH<sub>2</sub>NH<sub>2</sub>CH<sub>2</sub>C<sub>6</sub>H<sub>4</sub>OCH<sub>2</sub>CH<sub>2</sub>CH=CHCOOC<sub>6</sub>H<sub>3</sub>Me<sub>2</sub>-3,5)](BAr<sub>F</sub>) (12d)**

[AnCH<sub>2</sub>NH<sub>2</sub>CH<sub>2</sub>C<sub>6</sub>H<sub>4</sub>OCH<sub>2</sub>CH<sub>2</sub>CH=CH<sub>2</sub>](BAr<sub>F</sub>) (**3**) (123 mg, 0.10 mmol) was dissolved in 2 cm<sup>3</sup> of CH<sub>2</sub>Cl<sub>2</sub> containing **1** (61 mg, 0.11 mmol) and the solution was stirred for 2 h at room temperature, followed by addition of 3,5-dimethylphenyl acrylate (35 mg, 0.20 mmol) and (H<sub>2</sub>IMes)(PCy<sub>3</sub>)Cl<sub>2</sub>Ru=CHPh (H<sub>2</sub>Imes = *N,N*-bis(mesityl)-4,5-dihydroimidazol-2-ylidene)

(cat. Ru, 4.2 mg,  $5.0 \times 10^{-3}$  mmol). The mixture was refluxed for 9 h and solvent was removed by evaporation to form brown oil. The crude product was purified by preparative HPLC (eluent:  $\text{CHCl}_3$ ) to give **12d** as yellow solid (125 mg, 0.065 mmol, 65%) (Found: C, 58.44; H, 4.54; N, 0.75.  $\text{C}_9\text{H}_8\text{BF}_2\text{FeNO}_{11}(\text{H}_2\text{O})$  requires C, 58.39; H, 4.33; N, 0.72%);  $\delta_{\text{H}}$ (300 MHz;  $\text{CDCl}_3$ ; r.t.) 2.31 (6 H, s,  $\text{CH}_3$ ), 2.77 (2 H, dt,  $J$  6 and 6,  $\text{CH}_2\text{CH}=\text{CH}$ ), 3.29-4.22 (34 H,  $\text{C}_5\text{H}_4$ ,  $\text{CH}_2$ -Crown,  $\text{OCH}_2$ -Axle), 5.24 (2 H, m,  $\text{NCH}_2$ ), 5.66 (2 H, m,  $\text{NCH}_2$ ), 5.74 (2 H, m,  $\text{C}_6\text{H}_4$ -Crown), 6.16 (1 H, d,  $J$  16,  $\text{CH}_2\text{CH}=\text{CH}$ ), 6.54 (2 H, m,  $\text{C}_6\text{H}_4$ -Crown), 6.73 (2 H, s, ortho- $\text{C}_6\text{H}_3\text{Me}_2$ ), 6.88 (1 H, s, para- $\text{C}_6\text{H}_3\text{Me}_2$ ), 6.98 (2 H, d,  $J$  8,  $\text{C}_6\text{H}_4$ -Axle), 7.24 (1 H, dt,  $J$  16 and 6,  $\text{CH}_2\text{CH}=\text{CH}$ ), 7.45 (2 H, dd,  $J$  8 and 8, H3-An), 7.56 (4 H, s, para- $\text{C}_6\text{H}_3(\text{CF}_3)_2$ ), 7.56 (2 H, dd,  $J$  8 and 8, H2-An), 7.56 (2 H, d,  $J$  8,  $\text{C}_6\text{H}_4$ -Axle), 7.76 (8 H, br s, ortho- $\text{C}_6\text{H}_3(\text{CF}_3)_2$ ), 7.83 (2 H, br s,  $\text{NH}_2$ ), 7.84 (2 H, d,  $J$  8, H4-An), 8.12 (1 H, s, H10-An) and 8.44 (2 H, d,  $J$  8, H1-An) ;  $\delta_{\text{C}}$ (100 MHz;  $\text{CDCl}_3$ ; r.t.) 21.2 ( $\text{CH}_3$ ), 32.0 ( $\text{CH}_2\text{CH}=\text{CH}$ ), 45.7 ( $\text{NCH}_2$ ), 52.4 ( $\text{NCH}_2$ ), 54.8 ( $\text{C}_5\text{H}_4$ ), 63.7 ( $\text{C}_5\text{H}_4$ ), 65.9, 67.7, 70.1, 70.3, 70.9, 71.2, 71.3, 110.9, 114.7, 117.4, 119.0, 120.3, 124.5 (quintet,  $J(\text{FC})$  271,  $\text{CF}_3$ ), 121.3, 122.9, 123.6, 125.0, 127.1, 127.5, 128.4, 128.9 (quintet,  $J(\text{FC})$  31,  $\text{C}(\text{CF}_3)$ ), 129.6, 130.5, 130.8, 130.8, 131.1, 134.7 (meta- $\text{C}_6\text{H}_3(\text{CF}_3)_2$ ), 139.2, 144.9, 146.4, 150.4, 158.9 ( $\text{C}_6\text{H}_4$ -Axle), 161.6 (quinted,  $J(\text{BC})$  50, ipso- $\text{C}_6\text{H}_3(\text{CF}_3)_2$ ) and 164.7 ( $\text{C}=\text{O}$ );  $m/z$  (FABMS) 1072 ( $[\text{M} - \text{BAr}_F]^+$ .  $\text{C}_{63}\text{H}_{70}\text{FeNO}_{11}$  requires 1072).

**$[(\text{FcCH}_2\text{NH}_2\text{CH}_2\text{C}_6\text{H}_4\text{OCH}_2\text{CH}_2\text{CH}=\text{CHCOOAn})(1)](\text{BAr}_F)$  (**12e**)**

$[\text{FcCH}_2\text{NH}_2\text{CH}_2\text{C}_6\text{H}_4\text{OCH}_2\text{CH}_2\text{CH}=\text{CH}_2](\text{BARF})$  (**4**) (124 mg, 0.10 mmol) was dissolved in  $2.0 \text{ cm}^3$  of  $\text{CH}_2\text{Cl}_2$  containing **1** (61 mg, 0.12 mmol) and the solution was stirred for 2 h at room temperature, followed by addition of  $\text{AnOCOCH}=\text{CH}_2$  (50 mg, 0.20 mmol) and  $(\text{H}_2\text{IMes})(\text{PCy}_3)\text{Cl}_2\text{Ru}=\text{CHPh}$  (cat. Ru, 4.2 mg,  $5.0 \times 10^{-3}$  mmol). The mixture was refluxed for 10 h and solvent was removed by evaporation to form brown oil. The crude product was purified by preparative HPLC (eluent:  $\text{CHCl}_3$ ) to give **12e** as purple solid (0.10 g, 0.050 mmol, 50%) (Found: C, 57.28; H, 4.15; N, 0.69.  $\text{C}_{97}\text{H}_{82}\text{BF}_2\text{Fe}_2\text{NO}_{11}(\text{H}_2\text{O})$  requires C, 57.27;

H, 4.16; N, 0.69%);  $\delta_{\text{H}}$ (300 MHz; CDCl<sub>3</sub>; r.t.) 2.87 (2 H, dt, *J* 6 and 6, CH<sub>2</sub>CH=CH), 3.33-4.30 (43 H, m, OCH<sub>2</sub>-Axle, C<sub>5</sub>H<sub>4</sub>-Axle, C<sub>5</sub>H<sub>5</sub>, C<sub>5</sub>H<sub>4</sub>-crown), 4.24 (2 H, m, NCH<sub>2</sub>), 4.50 (2 H, m, NCH<sub>2</sub>), 6.51 (1 H, d, *J* 16, CH<sub>2</sub>CH=CH), 6.73 (2 H, m, C<sub>6</sub>H<sub>4</sub>-Crown), 6.76 (2 H, d, *J* 9, C<sub>6</sub>H<sub>4</sub>-Axle), 6.94 (2 H, m, C<sub>6</sub>H<sub>4</sub>-Crown), 7.26 (2 H, d, *J* 9, C<sub>6</sub>H<sub>4</sub>-Axle), 7.36 (2 H, br s, NH<sub>2</sub>), 7.45-7.53 (5 H, m, H<sub>2</sub>-An, H<sub>3</sub>-An, CH<sub>2</sub>CH=CH), 7.58 (4 H, s, para-C<sub>6</sub>H<sub>3</sub>), 7.77 (8 H, br s, ortho-C<sub>6</sub>H<sub>3</sub>), 7.96 (2 H, m, H<sub>1</sub>-An or H<sub>4</sub>-An), 8.04 (2 H, m, H<sub>1</sub>-An or H<sub>4</sub>-An) and 8.40 (1 H, s, H<sub>10</sub>-An);  $\delta_{\text{C}}$ (100 MHz; CDCl<sub>3</sub>; r.t.) 32.2 (CH<sub>2</sub>CH=CH), 48.5 (NCH<sub>2</sub>), 51.6 (NCH<sub>2</sub>), 55.4 (C<sub>5</sub>H<sub>4</sub>-Crown), 57.1 (C<sub>5</sub>H<sub>4</sub>-Crown), 62.8 (C<sub>5</sub>H<sub>4</sub>-Crown), 63.1 (C<sub>5</sub>H<sub>4</sub>-Crown), 65.6 (OCH<sub>2</sub>-Axle), 68.5 (CH<sub>2</sub>-Crown), 68.9 (2C, C<sub>5</sub>H<sub>5</sub>, C<sub>5</sub>H<sub>4</sub>-Axle), 69.4 (C<sub>5</sub>H<sub>4</sub>-Axle), 69.7 (CH<sub>2</sub>-Crown), 70.2 (CH<sub>2</sub>-Crown), 70.8 (CH<sub>2</sub>-Crown), 70.9 (CH<sub>2</sub>-Crown), 71.0 (CH<sub>2</sub>-Crown), 75.9 (C<sub>5</sub>H<sub>4</sub>-Axle), 112.3 (C<sub>6</sub>H<sub>4</sub>-Crown), 114.4 (C<sub>6</sub>H<sub>4</sub>-Axle), 117.4 (para-C<sub>6</sub>H<sub>3</sub>), 124.5 (quintet, *J*(FC) 271, CF<sub>3</sub>), 121.3 (An), 121.9 (CH<sub>2</sub>CH=CH), 123.6, 123.9, 124.7 (10C-An), 125.5 (An), 126.1 (An), 128.4 (An), 128.8 (quintet, *J*(FC) 31, CCF<sub>3</sub>), 130.8 (C<sub>6</sub>H<sub>4</sub>-Axle), 131.8, 134.7 (ortho-C<sub>6</sub>H<sub>3</sub>), 141.9, 146.7, 148.1 (CH<sub>2</sub>CH=CH), 159.3 (C<sub>6</sub>H<sub>4</sub>-Axle), 161.6 (quintet, *J*(BC) 50, BC) and 164.7 (C=O). Quantry carbons of ferrocenylene group in crown ether was not observed probably due to its weak intensity. *m/z* (FABMS) 1152 ([M - BAr<sub>F</sub>]<sup>+</sup>. C<sub>65</sub>H<sub>70</sub>NO<sub>11</sub> requires 1152).

**[[FeCH<sub>2</sub>NH<sub>2</sub>CH<sub>2</sub>C<sub>6</sub>H<sub>4</sub>-4-OCH<sub>2</sub>CH<sub>2</sub>CH=CHCOOCH<sub>2</sub>An}(1)](BAr<sub>F</sub>) (12f)**

**4** (124 mg, 0.10 mmol) and **1** (61 mg, 0.11 mmol) was dissolved in CH<sub>2</sub>Cl<sub>2</sub> (2.0 cm<sup>3</sup>), followed by addition of CH<sub>2</sub>=CHCOOAn (50 mg, 0.20 mmol) and a Ru-carbene complex (H<sub>2</sub>IMes)(PCy<sub>3</sub>)Cl<sub>2</sub>Ru=CHPh (4.2 mg, 5.0 × 10<sup>-3</sup> mmol). The mixture was refluxed for 10 h and the solvent was removed by evaporation to give a brown oil. The crude product was purified by preparative HPLC (CHCl<sub>3</sub>) to give **12f** as a yellow solid (100 mg, 0.050 mmol, 50%) (Found: C, 57.21; H, 4.50; N, 0.76. C<sub>98</sub>H<sub>84</sub>BF<sub>24</sub>Fe<sub>2</sub>NO<sub>11</sub>(H<sub>2</sub>O) requires C, 57.47; H, 4.23; N, 0.68%);  $\delta_{\text{H}}$ (300 MHz; CDCl<sub>3</sub>; r.t.) 2.61 (2 H, dt, *J* 6 and 6, CH<sub>2</sub>CH=CH), 3.30-4.29 (43 H, m, OCH<sub>2</sub>-Axle, C<sub>5</sub>H<sub>4</sub>-Axle, C<sub>5</sub>H<sub>5</sub>, C<sub>5</sub>H<sub>4</sub>-Crown), 4.23 (2 H, m, NCH<sub>2</sub>), 4.50 (2 H, m,

NCH<sub>2</sub>), 5.95 (1 H, d, *J* 16, CH<sub>2</sub>CH=CH), 6.24 (2 H, s, AnCH<sub>2</sub>), 6.66 (2 H, m, C<sub>6</sub>H<sub>4</sub>-Crown), 6.85 (2 H, m, C<sub>6</sub>H<sub>4</sub>-Crown), 7.07 (1 H, dt, *J* 16 and 7, CH<sub>2</sub>CH=CH), 7.19 (2 H, d, *J* 9, C<sub>6</sub>H<sub>4</sub>), 7.31 (2 H, br s, NH<sub>2</sub>), 7.46-7.60 (5 H, m, H<sub>2</sub>-An, H<sub>3</sub>-An), 7.56 (4 H, s, para-C<sub>6</sub>H<sub>3</sub>), 7.76 (8 H, br s, ortho-C<sub>6</sub>H<sub>3</sub>), 8.03 (2 H, m, H<sub>1</sub>-An or H<sub>4</sub>-An), 8.37 (2 H, m, H<sub>1</sub>-An or H<sub>4</sub>-An) and 8.51 (1 H, s, H<sub>10</sub>-An); δ<sub>C</sub>(100 MHz; CDCl<sub>3</sub>; r.t.) 31.7 (CH<sub>2</sub>CH=CH), 48.5 (NCH<sub>2</sub>), 51.6 (NCH<sub>2</sub>), 55.4 (C<sub>5</sub>H<sub>4</sub>-Crown), 57.1 (C<sub>5</sub>H<sub>4</sub>-Crown), 58.8 (OCH<sub>2</sub>-Axle), 62.6 (C<sub>5</sub>H<sub>4</sub>-Crown), 62.9 (C<sub>5</sub>H<sub>4</sub>-Crown), 65.6 (OCH<sub>2</sub>), 68.4 (CH<sub>2</sub>-Crown), 68.9 (2C, C<sub>5</sub>H<sub>5</sub>, C<sub>5</sub>H<sub>4</sub>-Axle), 69.0, 69.4 (C<sub>5</sub>H<sub>4</sub>-Axle), 69.7 (CH<sub>2</sub>-Crown), 70.1 (CH<sub>2</sub>-Crown), 70.8 (CH<sub>2</sub>-Crown), 71.0 (CH<sub>2</sub>-Crown), 75.8 (C<sub>5</sub>H<sub>4</sub>-Axle), 112.2 (C<sub>6</sub>H<sub>4</sub>-Crown), 114.3 (C<sub>6</sub>H<sub>4</sub>-Axle), 117.4 (para-C<sub>6</sub>H<sub>3</sub>), 121.9 (C<sub>6</sub>H<sub>4</sub>-Crown), 122.9 (CH<sub>2</sub>CH=CH), 123.8 (C<sub>1</sub>-An), 123.4, 125.0 (C<sub>2</sub>-An or C<sub>3</sub>-An), 124.5 (quintet, *J*(FC) 271, CF<sub>3</sub>), 126.1, 126.6 (C<sub>2</sub>-An or C<sub>3</sub>-An), 128.8 (quintet, *J*(FC) 33, CCF<sub>3</sub>), 129.0 (C<sub>4</sub>-An), 129.2 (C<sub>10</sub>-An), 130.7 (C<sub>6</sub>H<sub>4</sub>-Axle), 131.0, 131.3, 134.7 (ortho-C<sub>6</sub>H<sub>3</sub>), 145.2 (CH<sub>2</sub>CH=CH), 146.6, 159.1, 161.6 (quintet, *J*(BC) 50, BC) and 166.3 (C=O); *m/z* (FABMS) 1166 ([M - BAr<sub>F</sub>]<sup>+</sup>. C<sub>66</sub>H<sub>72</sub>NO<sub>11</sub>Fe<sub>2</sub> requires 1166).

**[(AnCH<sub>2</sub>NH<sub>2</sub>CH<sub>2</sub>C<sub>6</sub>H<sub>4</sub>OCH<sub>2</sub>CH<sub>2</sub>CH=CHCOOC<sub>6</sub>H<sub>3</sub>Me<sub>2</sub>-3,5)(DB24C8)](BAr<sub>F</sub>) (12g)**

[AnCH<sub>2</sub>NH<sub>2</sub>CH<sub>2</sub>C<sub>6</sub>H<sub>4</sub>OCH<sub>2</sub>CH<sub>2</sub>CH=CH<sub>2</sub>](BAr<sub>F</sub>) (**3**) (123 mg, 0.10 mmol) was dissolved in 2.0 cm<sup>3</sup> of CH<sub>2</sub>Cl<sub>2</sub> containing DB24C8 (54 mg, 0.12 mmol) and the solution was stirred for 15 min at room temperature, followed by addition of 3,5-dimethylphenyl acrylate (35 mg, 0.20 mmol) and (H<sub>2</sub>IMes)(PCy<sub>3</sub>)Cl<sub>2</sub>Ru=CHPh (Cat. Ru, 4.2 mg, 5.0 × 10<sup>-3</sup> mmol). The mixture was refluxed for 12 h and solvent was removed by evaporation to form brown oil. The crude product was purified by preparative HPLC (eluant: CHCl<sub>3</sub>) to give **12g** as purple solid (97 mg, 0.053 mmol, 53%) (Found: C, 59.83; H, 4.59; N, 0.82. C<sub>91</sub>H<sub>78</sub>BF<sub>24</sub>NO<sub>11</sub> requires C, 59.78; H, 4.30; N, 0.77%); δ<sub>H</sub>(300 MHz; CDCl<sub>3</sub>; r.t.) 2.32 (6 H, s, CH<sub>3</sub>), 2.76 (2 H, dt, *J* 6 and 6, CH<sub>2</sub>CH=CH), 3.34-3.57 (8 H, C<sub>6</sub>H<sub>4</sub>OCH<sub>2</sub>CH<sub>2</sub>OCH<sub>2</sub>-DB24C8), 3.63-3.82 (8 H, C<sub>6</sub>H<sub>4</sub>OCH<sub>2</sub>CH<sub>2</sub>-DB24C8), 3.76-3.91 (8 H, C<sub>6</sub>H<sub>4</sub>OCH<sub>2</sub>-DB24C8), 4.10 (2 H, t, *J* 6, OCH<sub>2</sub>-Axle), 5.25 (2 H, m, NCH<sub>2</sub>C<sub>6</sub>H<sub>4</sub>), 5.52 (2 H, m, NCH<sub>2</sub>An), 6.16 (1 H, d, *J* 16, CH<sub>2</sub>CH=CH),

6.33 (4 H, m, ortho-C<sub>6</sub>H<sub>4</sub>-DB24C8), 6.71 (4 H, m, meta-C<sub>6</sub>H<sub>4</sub>-DB24C8), 6.74 (2 H, s, ortho-C<sub>6</sub>H<sub>3</sub>Me<sub>2</sub>), 6.88 (1 H, s, para-C<sub>6</sub>H<sub>3</sub>Me<sub>2</sub>), 6.89 (2 H, d, *J* 8, ortho-C<sub>6</sub>H<sub>4</sub>-Axle), 7.24 (1 H, dt, *J* 16 and 6, CH<sub>2</sub>CH=CH), 7.41 (2 H, d, *J* 8, meta-C<sub>6</sub>H<sub>4</sub>-Axle), 7.43 (2 H, dt, *J* 8 and 8, H3-An), 7.53 (2 H, dt, *J* 8 and 8, H2-An), 7.56 (4 H, s, para-C<sub>6</sub>H<sub>3</sub>(CF<sub>3</sub>)<sub>2</sub>), 7.66 (2 H, br s, NH<sub>2</sub>), 7.76 (8 H, br s, ortho-C<sub>6</sub>H<sub>3</sub>(CF<sub>3</sub>)<sub>2</sub>), 7.84 (2 H, d, *J* 8, H4-An), 8.14 (1 H, s, H10-An) and 8.43 (2 H, d, *J* 9, H1-An);  $\delta_{\text{C}}$ (100 MHz; CDCl<sub>3</sub>; r.t.) 21.2 (CH<sub>3</sub>), 32.1 (CH<sub>2</sub>CH=CH), 45.5 (NCH<sub>2</sub>An), 52.4 (NCH<sub>2</sub>C<sub>6</sub>H<sub>4</sub>), 65.8 (OCH<sub>2</sub>-Axle), 67.9 (C<sub>6</sub>H<sub>4</sub>OCH<sub>2</sub>-DB24C8), 70.4 (C<sub>6</sub>H<sub>4</sub>OCH<sub>2</sub>CH<sub>2</sub>-DB24C8), 71.0 (C<sub>6</sub>H<sub>4</sub>OCH<sub>2</sub>CH<sub>2</sub>OCH<sub>2</sub>-DB24C8), 111.9 (ortho-C<sub>6</sub>H<sub>4</sub>-DB24C8), 114.5 (ortho-C<sub>6</sub>H<sub>4</sub>-Axle), 117.4 (para-C<sub>6</sub>H<sub>3</sub>(CF<sub>3</sub>)<sub>2</sub>), 119.0 (ortho-C<sub>6</sub>H<sub>3</sub>Me<sub>2</sub>), 120.9, 121.5 (meta-C<sub>6</sub>H<sub>4</sub>-DB24C8), 122.9 (CH<sub>2</sub>CH=CH), 123.2, 123.4 (C1-An), 124.1 (quintet, *J*(FC) 271, CF<sub>3</sub>), 124.9 (ortho-C<sub>6</sub>H<sub>4</sub>-Axle or meta-C<sub>6</sub>H<sub>4</sub>-Axle), 125.9, 127.0 (para-C<sub>6</sub>H<sub>3</sub>(CF<sub>3</sub>)<sub>2</sub>), 127.5 (para-C<sub>6</sub>H<sub>3</sub>Me<sub>2</sub>), 128.5 (meta-C<sub>6</sub>H<sub>4</sub>-Axle or meta-C<sub>6</sub>H<sub>4</sub>-Axle), 128.9 (quintet, *J*(FC) 31, CCF<sub>3</sub>), 129.5 (C3-An), 130.6, 130.8, 130.8, 158.7 (C<sub>6</sub>H<sub>4</sub>-Axle), 161.6 (quintet, *J*(BC) 50, BC) and 164.7 (C=O); *m/z* (FABMS) 964 ([M - BAr<sub>F</sub>]<sup>+</sup>. C<sub>59</sub>H<sub>66</sub>NO<sub>11</sub> requires 964).

**[(FcCH<sub>2</sub>NH<sub>2</sub>CH<sub>2</sub>C<sub>6</sub>H<sub>4</sub>OCH<sub>2</sub>CH<sub>2</sub>CH=CHCOOAn)(DB24C8)](BAr<sub>F</sub>) (12h)**

[FcCH<sub>2</sub>NH<sub>2</sub>CH<sub>2</sub>C<sub>6</sub>H<sub>4</sub>OCH<sub>2</sub>CH<sub>2</sub>CH=CH<sub>2</sub>](BAr<sub>F</sub>) (**4**) (124 mg, 0.10 mmol) was dissolved in 2 cm<sup>3</sup> of CH<sub>2</sub>Cl<sub>2</sub> containing DB24C8 (54 mg, 0.12 mmol) and the solution was stirred for 15 min at room temperature, followed by addition of AnOCOCH=CH<sub>2</sub> (50 mg, 0.20 mmol) and (H<sub>2</sub>IMes)(PCy<sub>3</sub>)Cl<sub>2</sub>Ru=CHPh (Cat. Ru, 4.2 mg, 5 × 10<sup>-3</sup> mmol). The mixture was refluxed for 11 h and solvent was removed by evaporation to form brown oil. The crude product was purified by preparative HPLC (eluant: CHCl<sub>3</sub>) to give **12h** as yellow solid (100 mg, 0.052 mmol, 52%) (Found: C, 58.02; H, 4.12; N, 0.87. C<sub>93</sub>H<sub>78</sub>BF<sub>24</sub>FeN<sub>1</sub>O<sub>11</sub>(H<sub>2</sub>O) requires C, 57.99; H, 4.19; N, 0.73%);  $\delta_{\text{H}}$ (400 MHz; CDCl<sub>3</sub>; r.t.) 2.89 (2 H, br, CH<sub>2</sub>CH=CH), 3.12-4.50 (37 H), 4.63 (2 H, br s), 6.52 (1 H, br s, CH<sub>2</sub>CH=CH), 6.70-7.60 (19 H), 7.54 (4 H, s, para-C<sub>6</sub>H<sub>3</sub>), 7.73 (8 H, s, ortho-C<sub>6</sub>H<sub>3</sub>), 7.96 (2 H, br s), 8.03 (2 H, br s) and 8.39 (1 H, s, H10-An);  $\delta_{\text{C}}$ (100 MHz; CDCl<sub>3</sub>; r.t.) 32.3 (CH<sub>2</sub>CH=CH), 48.9 (NCH<sub>2</sub>), 51.6 (NCH<sub>2</sub>), 66.0, 68.7, 70.4, 70.9, 72.6



(br, C<sub>5</sub>H<sub>5</sub>), 113.2, 114.5, 117.3, 121.3, 122.0, 123.8, 124.4, 124.4 (quintet, *J*(FC) 271, CF<sub>3</sub>), 124.6, 125.5, 126.1, 128.3, 128.7 (quintet, *J*(FC) 31, meta-C<sub>6</sub>H<sub>3</sub>), 130.9, 131.7, 134.6, 141.8, 147.4, 148.2, 159.0 (C<sub>6</sub>H<sub>4</sub>-Axle), 161.5 (quintet, *J*(BC) 50, BC) and 164.6 (C=O); *m/z* (FABMS) 1044 ([M - BAr<sub>F</sub>]<sup>+</sup>. C<sub>61</sub>H<sub>66</sub>NO<sub>11</sub>Fe requires 1044).

**[[{(C<sub>6</sub>H<sub>3</sub>-3,5-Me<sub>2</sub>)CH<sub>2</sub>NH<sub>2</sub>CH<sub>2</sub>C<sub>6</sub>H<sub>4</sub>-4-OCH<sub>2</sub>CH<sub>2</sub>CH=CHCOOAn}(DB24C8)](BAr<sub>F</sub>)](12i) 5** (116 mg, 0.10 mmol) and DB24C8 (54 mg, 0.11 mmol) was dissolved in CH<sub>2</sub>Cl<sub>2</sub> (2.0 cm<sup>3</sup>), followed by addition of CH<sub>2</sub>=CHCOOAn (50 mg, 0.20 mmol) and a Ru-carbene complex (H<sub>2</sub>IMes)(PCy<sub>3</sub>)Cl<sub>2</sub>Ru=CHPh (4.2 mg, 5.0 × 10<sup>-3</sup> mmol). The mixture was refluxed for 12 h and the solvent was removed by evaporation to give brown oil. The crude product was purified by preparative HPLC (CHCl<sub>3</sub>) to give **12i** as a yellow solid (160 mg, 0.088 mmol, 88%) (Found: C, 59.67; H, 4.34; N, 0.79. C<sub>91</sub>H<sub>78</sub>NO<sub>11</sub>F<sub>24</sub>B requires C, 59.78; H, 4.30; N, 0.77%); δ<sub>H</sub>(300 MHz, CDCl<sub>3</sub>, r.t.) 2.17 (6 H, s, CH<sub>3</sub>), 2.91 (2 H, dt, *J* 6 and 6, CH<sub>2</sub>CH=CH), 3.35 (8 H, m, CH<sub>2</sub>-DB24C8), 3.72 (8 H, m, CH<sub>2</sub>-DB24C8), 4.10 (8 H, m, CH<sub>2</sub>-DB24C8), 4.18 (2 H, t, *J* 6, OCH<sub>2</sub>-Axle), 4.42 (2 H, m, NCH<sub>2</sub>), 4.63 (2 H, m, NCH<sub>2</sub>), 6.56 (1 H, d, *J* 16, CH<sub>2</sub>CH=CH), 6.77-6.97 (9 H, C<sub>6</sub>H<sub>4</sub>-DB24C8, C<sub>6</sub>H<sub>4</sub>-Axle, ortho-C<sub>6</sub>H<sub>3</sub>, para-C<sub>6</sub>H<sub>3</sub>), 7.37 (2 H, d, *J* 9, C<sub>6</sub>H<sub>4</sub>-Axle), 7.45 (2 H, br s, NH<sub>2</sub>), 7.48-7.57 (5 H, CH<sub>2</sub>CH=CH, An), 7.62 (4 H, s, para-C<sub>6</sub>H<sub>3</sub>), 7.82 (8 H, m, ortho-C<sub>6</sub>H<sub>3</sub>), 8.01-8.07 (4 H, An) and 8.42 (1 H, s, H10-An); δ<sub>C</sub>(100 MHz; CDCl<sub>3</sub>; r.t.) 21.0 (CH<sub>3</sub>), 32.2 (CH<sub>2</sub>CH=CH), 52.1 (NCH<sub>2</sub>), 52.6 (NCH<sub>2</sub>), 65.7 (OCH<sub>2</sub>-Axle), 68.1 (CH<sub>2</sub>-DB24C8), 70.1 (CH<sub>2</sub>-DB24C8), 70.5 (CH<sub>2</sub>-DB24C8), 112.7 (C<sub>6</sub>H<sub>4</sub>-DB24C8), 114.4 (C<sub>6</sub>H<sub>4</sub>-Axle), 117.4 (para-C<sub>6</sub>H<sub>3</sub>), 121.3 (An), 121.8 (C<sub>6</sub>H<sub>4</sub>-DB24C8), 121.9 (CH<sub>2</sub>CH=CH), 123.9, 124.1, 124.5 (quintet, *J*(FC) 271, CF<sub>3</sub>), 124.6 (10C-An), 125.5 (An), 126.1 (An), 126.4 (ortho-C<sub>6</sub>H<sub>4</sub>), 128.3 (An), 128.9 (quintet, *J*(FC) 31, CCF<sub>3</sub>), 130.7 (para-C<sub>6</sub>H<sub>3</sub>), 130.9 (C<sub>6</sub>H<sub>4</sub>-Axle), 131.2, 131.8, 134.7 (ortho-C<sub>6</sub>H<sub>3</sub>), 138.3, 141.9, 147.3, 148.2 (CH<sub>2</sub>CH=CH), 159.2 (C<sub>6</sub>H<sub>4</sub>-Axle), 161.6 (quintet, *J*(BC) 50, BC) and 164.7 (C=O); *m/z* (FABMS) 965 ([M - BAr<sub>F</sub>]<sup>+</sup>. C<sub>59</sub>H<sub>66</sub>NO<sub>11</sub> requires 965).

**[[AnCH<sub>2</sub>N(Ac)CH<sub>2</sub>C<sub>6</sub>H<sub>4</sub>-4-OCH<sub>2</sub>CH<sub>2</sub>CH=CHCOOC<sub>6</sub>H<sub>4</sub>-4-C(C<sub>6</sub>H<sub>4</sub>-4-tBu)<sub>3</sub>](1)](13b)**

To a solution of **12b** (0.19 g, 0.080 mmol) in MeCN (3.0 cm<sup>3</sup>) were added Et<sub>3</sub>N (5.6 × 10<sup>-2</sup> cm<sup>3</sup>, 0.40 mmol) and acetic anhydride (3.8 × 10<sup>-2</sup> cm<sup>3</sup>, 0.40 mmol), and the reaction mixture was stirred for 14 h at room temperature. After the removal of the solvent by evaporation, the product was purified by SiO<sub>2</sub> column chromatography (hexane/AcOEt 1:1) to give **13b** as a yellow solid (97 mg, 6.5 × 10<sup>-2</sup> mmol, 81%) (Found: C, 72.88; H, 6.89; N, 0.91. C<sub>94</sub>H<sub>105</sub>FeNO<sub>12</sub>(H<sub>2</sub>O)<sub>3</sub> requires C, 72.81; H, 7.21; N, 0.90%);  $\nu$ (KBr disk; r.t.)/cm<sup>-1</sup> 1651, 1732 (C=O);  $\delta_{\text{H}}$ (300 MHz; CDCl<sub>3</sub>; r.t) 1.31 (27 H, s, C(CH<sub>3</sub>)<sub>3</sub>), 2.19 (3 H, s, COCH<sub>3</sub>), 3.16 (2 H, dt, *J* 7 and 7, CH<sub>2</sub>CH=CH), 3.54-4.25 (34 H, C<sub>5</sub>H<sub>4</sub>, CH<sub>2</sub>-crown, NCH<sub>2</sub>), 4.52 (2 H, t, *J* 8, OCH<sub>2</sub>-Axle), 5.71 (2 H, s, NCH<sub>2</sub>), 6.43 (1 H, d, *J* 16, CH<sub>2</sub>CH=CH), 6.75 (2 H, d, *J* 8, C<sub>6</sub>H<sub>4</sub>), 6.84 (4 H, m, C<sub>6</sub>H<sub>4</sub>), 6.95 (2 H, d, C<sub>6</sub>H<sub>4</sub>), 6.98 (2 H, d, C<sub>6</sub>H<sub>4</sub>), 7.13 (6 H, d, *J* 8, C<sub>6</sub>H<sub>4</sub>(<sup>t</sup>BuC<sub>6</sub>H<sub>4</sub>)<sub>3</sub>), 7.22 (2 H, d, *J* 8, C<sub>6</sub>H<sub>4</sub>), 7.25 (6 H, d, *J* 8, <sup>t</sup>BuC<sub>6</sub>H<sub>4</sub>), 7.35-7.44 (4 H, 2H-An, 3H-An), 7.63 (1 H, dt, *J* 16 and 7, CH<sub>2</sub>CH=CH), 7.99 (2 H, d, *J* 8, 4H-An), 8.10 (2 H, d, *J* 9, 1H-An) and 8.45 (1 H, s, 10H-An);  $\delta_{\text{C}}$ (100 MHz; CDCl<sub>3</sub>; r.t.) 21.9 (COCH<sub>3</sub>), 31.4 (C(CH<sub>3</sub>)<sub>3</sub>), 32.7 (CH<sub>2</sub>CH=CH), 34.3 (C(CH<sub>3</sub>)<sub>3</sub>), 39.1 (NCH<sub>2</sub>), 48.6 (NCH<sub>2</sub>), 56.4 (C<sub>5</sub>H<sub>4</sub>), 56.5 (C<sub>5</sub>H<sub>4</sub>), 62.1 (2C, C<sub>5</sub>H<sub>4</sub>), 63.3 (C(<sup>t</sup>BuC<sub>6</sub>H<sub>4</sub>)<sub>3</sub>), 66.1 (OCH<sub>2</sub>-Axle), 68.1 (CH<sub>2</sub>-Crown), 69.6 (CH<sub>2</sub>-Crown), 69.7 (CH<sub>2</sub>-Crown), 70.0 (CH<sub>2</sub>-Crown), 70.6 (CH<sub>2</sub>-Crown), 70.9 (CH<sub>2</sub>-Crown), 112.2 (C<sub>6</sub>H<sub>4</sub>), 115.1 (C<sub>6</sub>H<sub>4</sub>), 120.1 (C<sub>6</sub>H<sub>4</sub>), 120.7 (C<sub>6</sub>H<sub>4</sub>), 121.5 (CH<sub>2</sub>CH=CH), 124.0 (<sup>t</sup>BuC<sub>6</sub>H<sub>4</sub>), 124.3 (1C-An), 124.9 (2C-An or 3C-An), 126.2 (2C-An or 3C-An), 126.5 (C<sub>6</sub>H<sub>4</sub>), 127.3, 128.0, 128.1 (10C-An), 128.9 (4C-An), 130.6 (<sup>t</sup>BuC<sub>6</sub>H<sub>4</sub>), 131.2, 131.4, 131.9 (C<sub>6</sub>H<sub>4</sub>), 143.6, 144.3, 148.2, 148.3, 148.6, 150.0 (CH<sub>2</sub>CH=CH), 158.5, 165.3 (NC=O) and 171.0 (C(C=O)); *R*<sub>f</sub> 0.25 (hexane/AcOEt 1:1).

**[{AnCH<sub>2</sub>N(Ac)CH<sub>2</sub>C<sub>6</sub>H<sub>4</sub>-4-OCH<sub>2</sub>CH<sub>2</sub>CH=CHCOO(CH<sub>2</sub>)<sub>11</sub>O(CH<sub>2</sub>)<sub>11</sub>OC<sub>6</sub>H<sub>4</sub>-4-C(C<sub>6</sub>H<sub>4</sub>-4-tBu)<sub>3</sub>}(1)] (13c)**

To a solution of **12c** (122 mg, 0.046 mmol) in MeCN/CH<sub>2</sub>Cl<sub>2</sub> (2.0 cm<sup>3</sup>/1.0 cm<sup>3</sup>) were added Et<sub>3</sub>N (3.3 × 10<sup>-2</sup> cm<sup>3</sup>, 0.24 mmol) and acetic anhydride (2.2 × 10<sup>-2</sup> cm<sup>3</sup>, 0.23 mmol), and the

reaction mixture was stirred for 14 h at room temperature. The solution was diluted with  $\text{CH}_2\text{Cl}_2$  and the organic layer was washed with water, dried over  $\text{MgSO}_4$ , filtered, and evaporated. The product was purified by  $\text{SiO}_2$  column chromatography (hexane/AcOEt 1:1) to give **13c** as a yellow solid (71 mg,  $3.8 \times 10^{-2}$  mmol, 84%);  $\delta_{\text{H}}$ (300 MHz;  $\text{CDCl}_3$ ; r.t.) 1.28 (27 H, s,  $\text{CH}_3$ ), 1.28-1.76 (36 H,  $\text{CH}_2$ ), 2.19 (3 H, s,  $\text{COCCH}_3$ ), 2.86 (2 H, br s,  $\text{CH}_2\text{CH}=\text{CH}$ ), 3.38-4.13 (40 H,  $\text{OCH}_2$ ,  $\text{C}_5\text{H}_4$ ,  $\text{NCH}_2$ ), 4.04 (2 H, s,  $\text{NCH}_2$ ), 4.36 (2 H, m,  $\text{OCH}_2$ ), 5.70 (2 H, s,  $\text{NCH}_2$ ), 6.05 (1 H, d,  $J$  15,  $\text{CH}=\text{CHCH}_2$ ), 6.76-6.91 (10 H,  $\text{C}_6\text{H}_4$ -Crown,  $\text{C}_6\text{H}_4\text{C}(\text{tBuC}_6\text{H}_4)$ ,  $\text{C}_6\text{H}_4\text{CH}_2\text{N}$ ), 7.06-7.11 (1 H,  $\text{CH}=\text{CHCH}_2$ ), 7.07 (2 H, d,  $J$  8,  $\text{C}_6\text{H}_4\text{C}(\text{tBuC}_6\text{H}_4)$ ), 7.10 (6 H, d,  $J$  8,  $\text{tBuC}_6\text{H}_4$ ), 7.23 (6 H, d,  $J$  8,  $\text{tBuC}_6\text{H}_4$ ), 7.40-7.45 (4 H, H2-An, H3-An), 8.01 (2 H, d,  $J$  7, H1 or 4H-An), 8.10 (2 H, d,  $J$  8, H1 or H4-An), 8.46 (1 H, s, H10-An);  $\delta_{\text{C}}$ (100 MHz;  $\text{CDCl}_3$ ; r.t.) 22.0 ( $\text{COCH}_3$ ), 26.0 ( $\text{CH}_2$ ), 26.1 ( $\text{CH}_2$ ), 26.2 (2 C,  $\text{CH}_2$ ), 28.8 ( $\text{CH}_2$ ), 29.4-29.6 (10 C,  $\text{CH}_2$ ), 29.8 (2 C,  $\text{CH}_2$ ), 31.3 ( $\text{CH}_3$ ), 32.3 ( $\text{CH}_2$ ), 34.3 ( $\text{C}(\text{CH}_3)$ ), 39.0 ( $\text{NCH}_2$ ), 48.6 ( $\text{NCH}_2$ ), 56.9 ( $\text{C}_5\text{H}_4$ ), 62.9 ( $\text{C}(\text{tBuC}_6\text{H}_4)_3$ ), 64.1 ( $\text{OCH}_2$ -Axle), 66.0 ( $\text{OCH}_2$ -Axle), 67.7 ( $\text{OCH}_2$ -Crown), 67.8 ( $\text{OCH}_2$ -Crown), 69.7 (2 C,  $\text{OCH}_2$ -Axle,  $\text{OCH}_2$ -Crown), 70.4 ( $\text{OCH}_2$ -Crown), 70.7 ( $\text{OCH}_2$ -Crown), 70.9 (2 C,  $\text{OCH}_2$ -Axle), 111.9 ( $\text{C}_6\text{H}_4$ ), 112.9, 115.1, 120.5, 122.2 ( $\text{CH}=\text{CHCH}_2$ ), 123.8 ( $\text{tBuC}_6\text{H}_4$ ), 124.3 (C1 or C4-An), 124.9 (C2 or C3-An), 126.2 (C2 or C3-An), 126.5, 126.9, 127.3, 127.9, 128.1 (C10-An), 128.9 (C1 or C4-An), 130.5 ( $\text{tBuC}_6\text{H}_4$ ), 131.1, 131.3, 131.9 ( $\text{C}_6\text{H}_4\text{C}(\text{tBuC}_6\text{H}_4)$ ), 139.0, 144.0, 146.8 ( $\text{CH}=\text{CHCH}_2$ ), 148.0, 156.7, 158.3, 166.8 ( $\text{C}=\text{O}$ ) and 170.9 ( $\text{C}=\text{O}$ );  $m/z$  (HRFABMS) 1836.0321 ( $[\text{M} - \text{BAr}_\text{F}]^+$ .  $\text{C}_{116}\text{H}_{149}\text{FeNO}_{14}$  requires 1836.0327);  $R_f$  0.40 (hexane/AcOEt 1:1).

Table S1. Crystal data and details of structure refinement of [K(1)]BPh<sub>4</sub>.

| Compound                                             | [K(1)]BPh <sub>4</sub>                             |
|------------------------------------------------------|----------------------------------------------------|
| formula                                              | C <sub>52</sub> H <sub>56</sub> BFeKO <sub>8</sub> |
| molecular weight                                     | 914.76                                             |
| crystal system                                       | monoclinic                                         |
| space group                                          | <i>P</i> 2 <sub>1</sub> /n (No. 14)                |
| <i>a</i> /Å                                          | 13.846(2)                                          |
| <i>b</i> /Å                                          | 22.065(4)                                          |
| <i>c</i> /Å                                          | 14.893(3)                                          |
| <i>β</i> /deg                                        | 92.6643(8)                                         |
| <i>U</i> /Å <sup>3</sup>                             | 4545(1)                                            |
| <i>Z</i>                                             | 4                                                  |
| <i>F</i> (000)                                       | 1928.00                                            |
| <i>D</i> c/ g cm <sup>-3</sup>                       | 1.337                                              |
| crystal size/mm                                      | 0.40 x 0.40 x 0.20                                 |
| unique reflections                                   | 10119                                              |
| used reflections [ <i>I</i> ≥ 2.0σ( <i>I</i> )]      | 8367                                               |
| no. of variables                                     | 635                                                |
| <i>R</i> [ <i>I</i> ≥ 2.0σ( <i>I</i> )]              | 0.0397                                             |
| <i>R</i> <sub>w</sub> [ <i>I</i> ≥ 2.0σ( <i>I</i> )] | 0.0624                                             |
| good of fitness                                      | 0.974                                              |

Table S2. Selected bond distances of [K(1)]BPh<sub>4</sub>.

| Atom | Atom | Distance / Å |
|------|------|--------------|
| K(1) | O(1) | 2.779(1)     |
| K(1) | O(2) | 2.836(2)     |
| K(1) | O(3) | 2.736(1)     |
| K(1) | O(4) | 2.822(1)     |
| K(1) | O(5) | 2.757(2)     |
| K(1) | O(6) | 2.927(2)     |
| K(1) | O(7) | 2.822(2)     |
| K(1) | O(8) | 2.880(1)     |

Table S3. Selected bond angles of [K(1)]BPh<sub>4</sub>.

| Atom | Atom | Atom  | Angle / ° |
|------|------|-------|-----------|
| K(1) | O(1) | C(5)  | 110.4(1)  |
| K(1) | O(1) | C(6)  | 115.6(1)  |
| K(1) | O(2) | C(7)  | 119.2(1)  |
| K(1) | O(2) | C(8)  | 117.9(1)  |
| K(1) | O(3) | C(9)  | 121.5(1)  |
| K(1) | O(3) | C(10) | 106.3(1)  |
| K(1) | O(4) | C(11) | 118.0(1)  |
| K(1) | O(4) | C(12) | 124.6(1)  |
| K(1) | O(5) | C(17) | 126.9(1)  |
| K(1) | O(5) | C(18) | 107.2(1)  |
| K(1) | O(6) | C(19) | 115.3(1)  |
| K(1) | O(6) | C(20) | 114.5(2)  |
| K(1) | O(7) | C(21) | 108.2(2)  |
| K(1) | O(7) | C(22) | 116.5(2)  |
| K(1) | O(7) | C(23) | 117.3(1)  |
| K(1) | O(8) | C(24) | 113.5(1)  |
| K(1) | O(8) | C(25) | 109.5(1)  |

Table S4. The calculated triplet levels of the compounds.<sup>a)</sup>

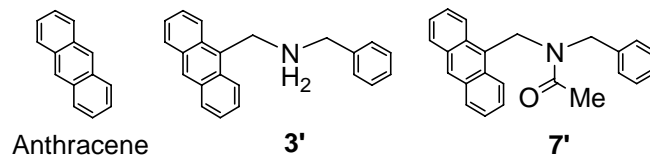

| Compound   | Triplet level /cm <sup>-1</sup> (calculated) | Triplet level /cm <sup>-1</sup> (experiment) |
|------------|----------------------------------------------|----------------------------------------------|
| Anthracene | 14 500                                       | 14 700, <sup>b)</sup> 14 870 <sup>c)</sup>   |
| <b>3'</b>  | 14 300                                       | -                                            |
| <b>7'</b>  | 14 100                                       | -                                            |

a) The structure of the compounds have been optimized with the B3LYP/6-31G(d) level of theory using the PC GAMESS/Firefly 7.1.F program (Ref S2). The excitation energy have been calculated with TD-B3LYP/6-31+G(d) level of theory using GAMESS (12 JAN 2009(R1)) programs (Ref S3). b) Ref S4. c) Ref S5.

## Reference

- (S1) C. I. Simionescu, M. Grigoras and V. Bărboiu, *J. Polym. Sci., Polym. Chem. Ed.*, 1985, **23**, 2089.
- (S2) A. A. Granovsky, *PC GAMESS/Firefly version 7.1.F*, [www  
http://classic.chem.msu.su/gran/gamess/index.html](http://classic.chem.msu.su/gran/gamess/index.html)
- (S3) (a) M. W. Schmidt, K. K. Baldridge, J. A. Boatz, S. T. Elbert, M. S. Gordon, J. H. Jensen, S. Koseki, N. Matsunaga, K. A. Nguyen, S. Su, T. L. Windus, M. Dupuis and J. A. Montgomery, *J. Comput. Chem.*, 1993, **14**, 1347.
- (b) M. S. Gordon and M. W. Schmidt, in *Theory and Applications of Computational Chemistry, the first forty years*, ed. C. E. Dykstra, G. Frenking, K. S. Kim and G. E. Scuseria, Elsevier, Amsterdam, 2005, pp. 1167-1189.
- (S4) G. N. Lewis and M. Kasha, *J. Am. Chem. Soc.*, 1944, **66**, 2100.
- (S5) D. F. Evans, *J. Chem. Soc.*, 1957, 1351.
